# Supplementary material for: Synthesis, structure, and anion binding of functional oxacalix[4]arenes
Source: Royal Society of Chemistry journal article supplement (doi:10.1039/c9ob00613c), 2019-01-01
Supplement: c9ob00613c1.pdf [file c9ob00613c1.pdf]

## Electronic Supplementary Information

### Synthesis, structure, and anion binding of functional oxacalix[4]arenes

Jiao-Xia Ma, Xu Fang, Min Xue, and Yong Yang\*

School of Sciences, Zhejiang Sci-Tech University, Hangzhou 310018, China. Email:  
[yangyong@zstu.edu.cn](mailto:yangyong@zstu.edu.cn)

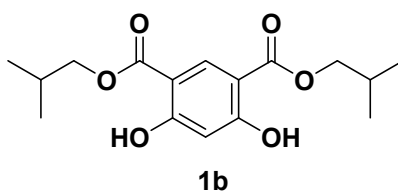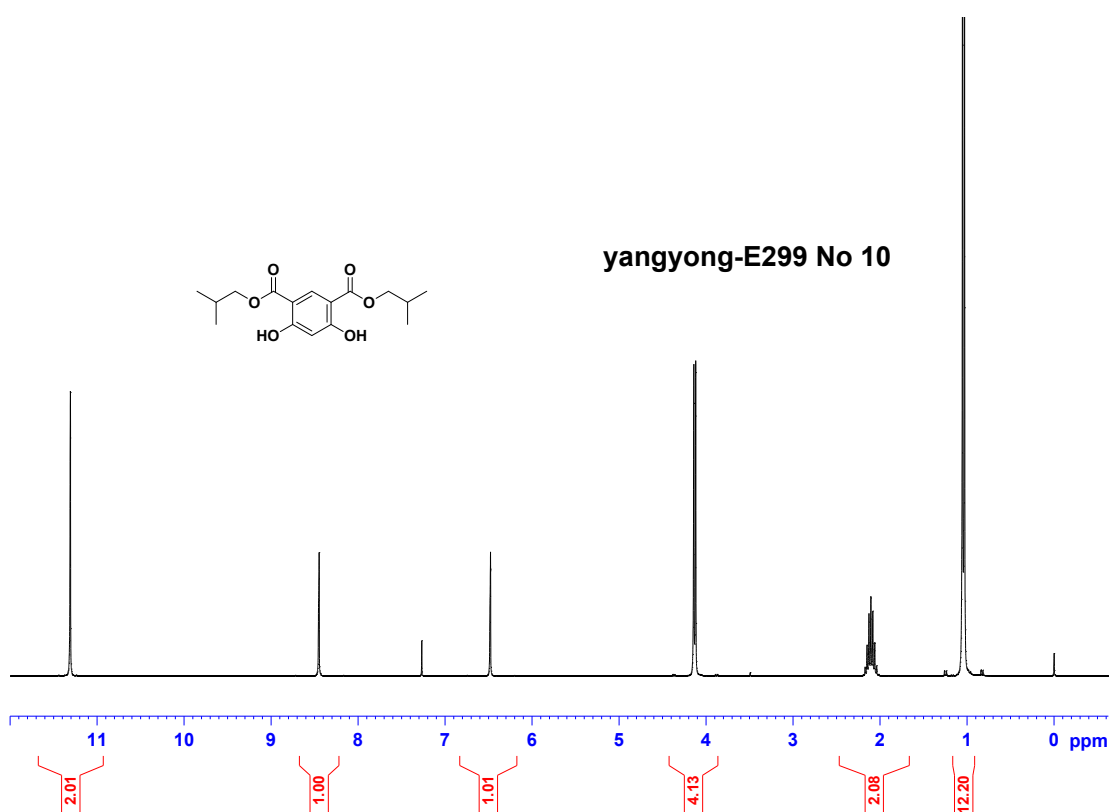

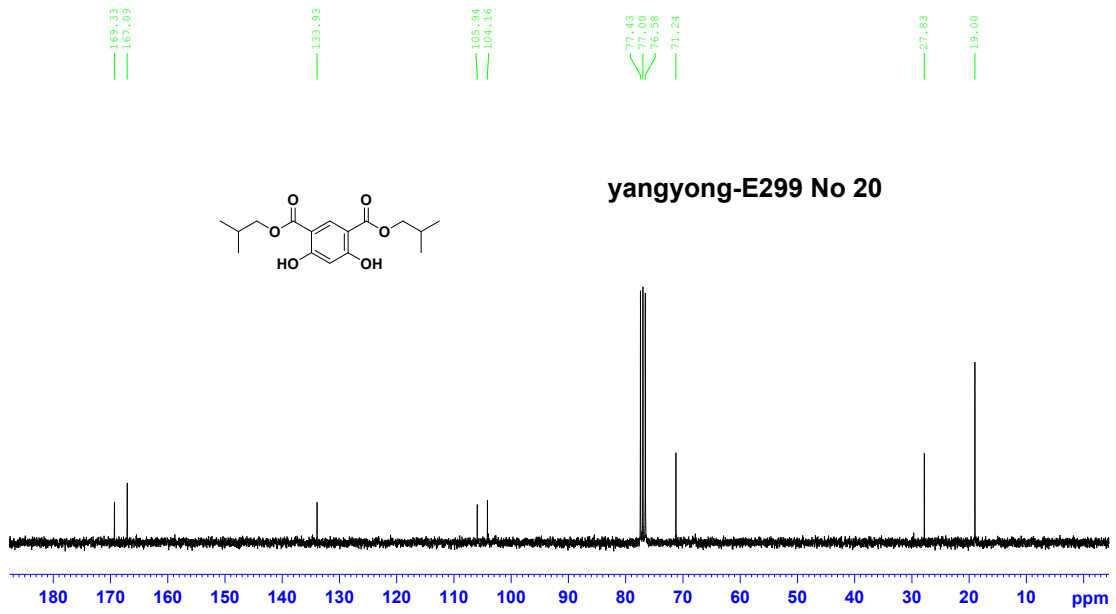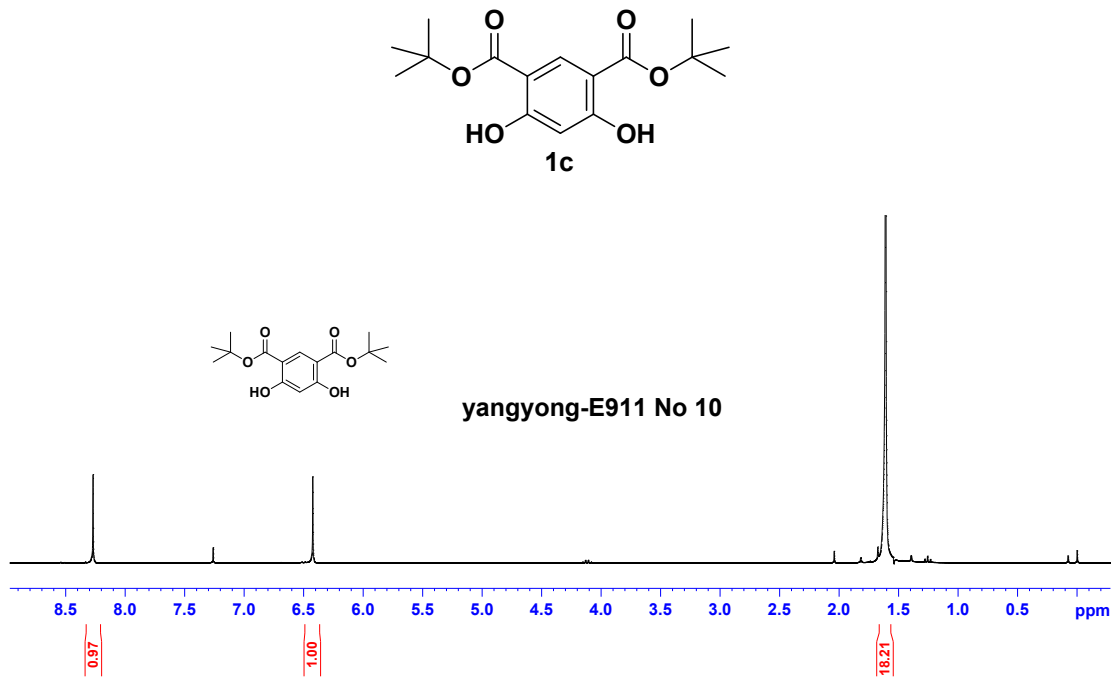

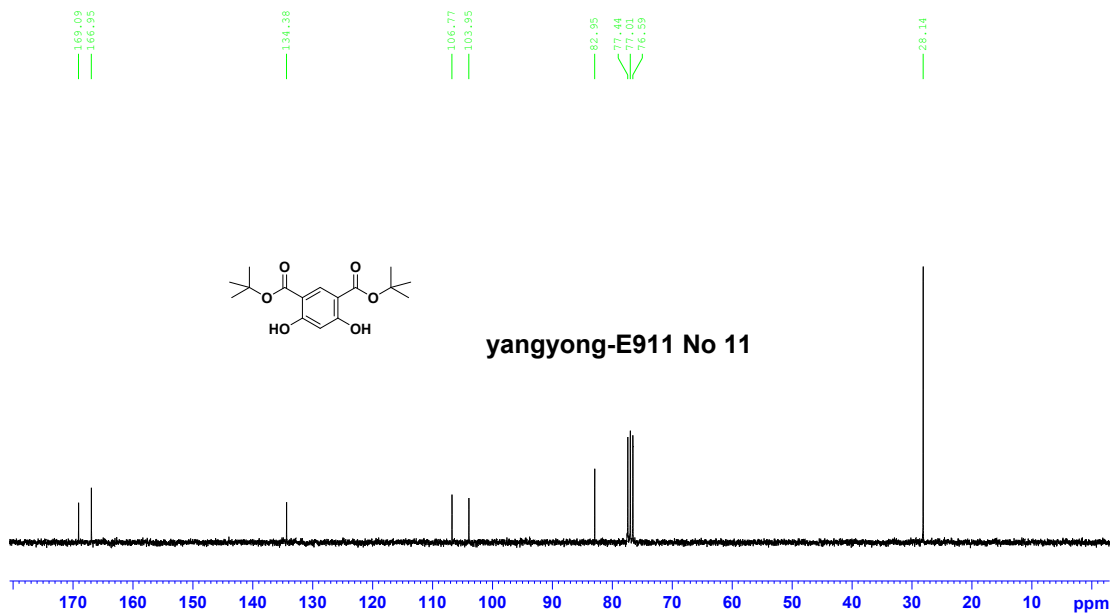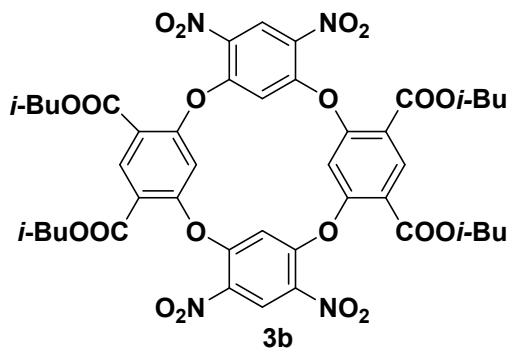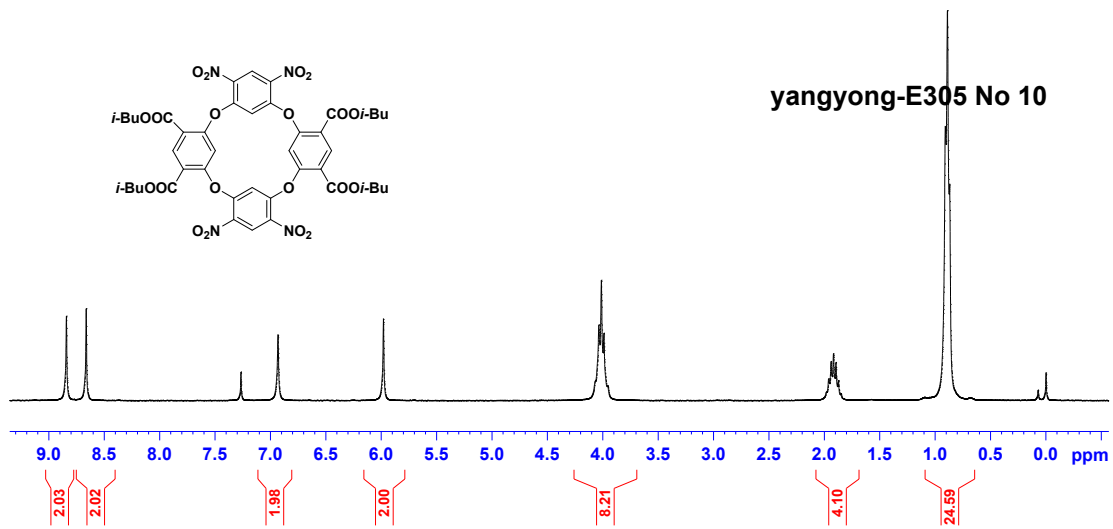

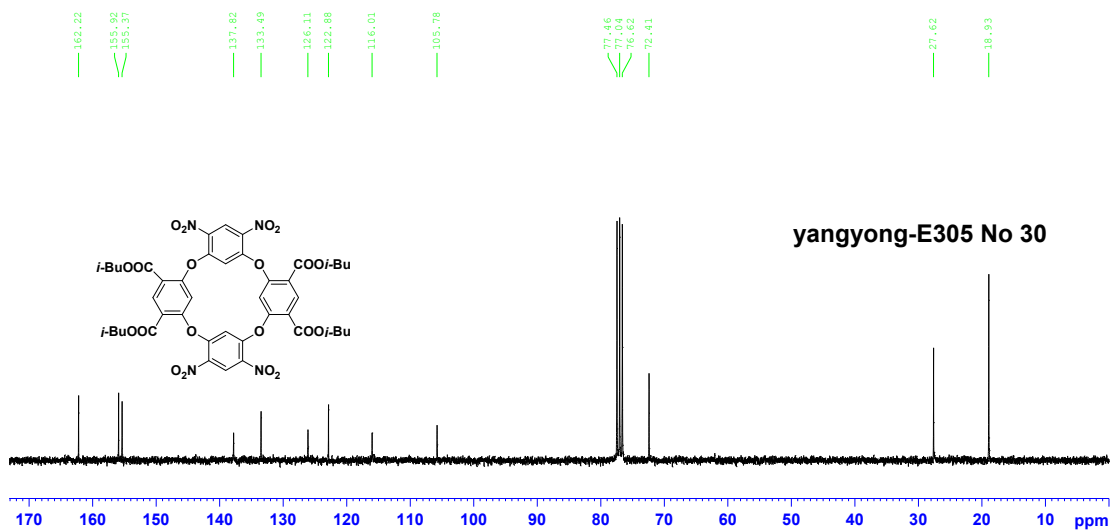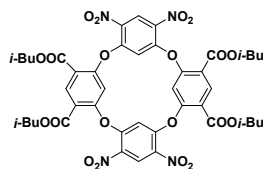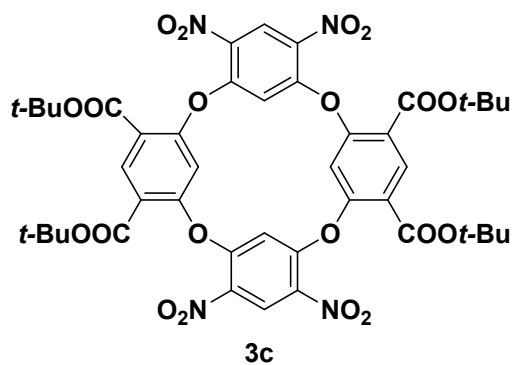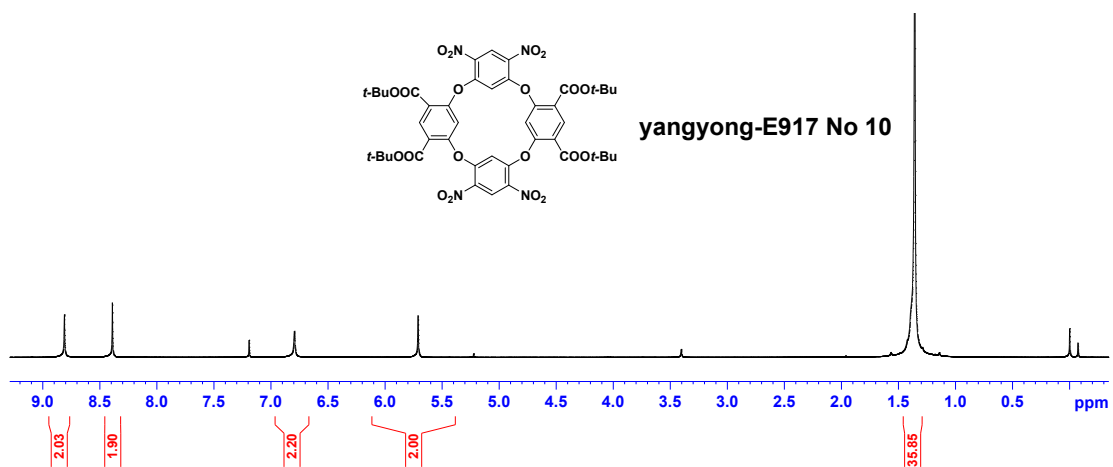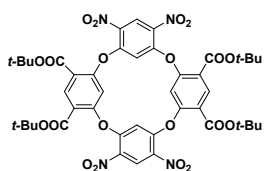



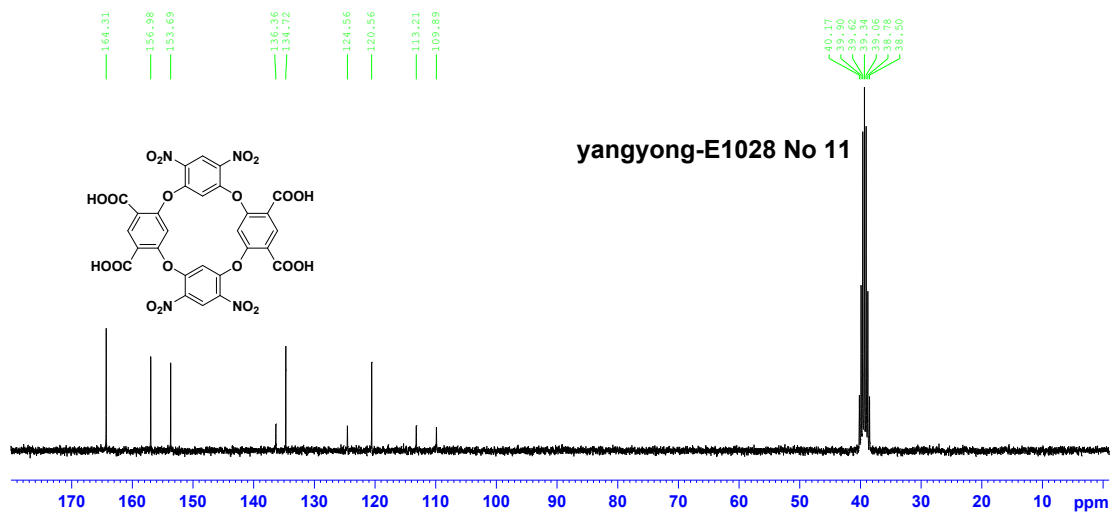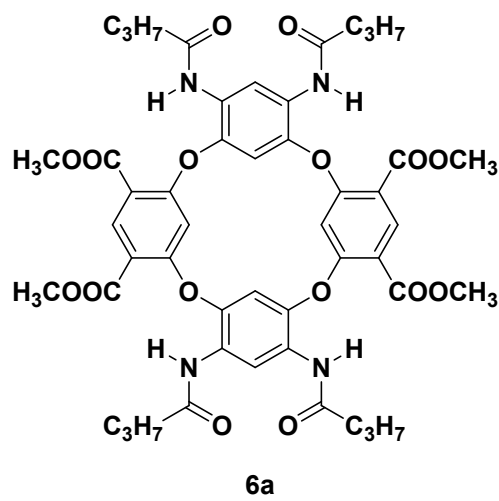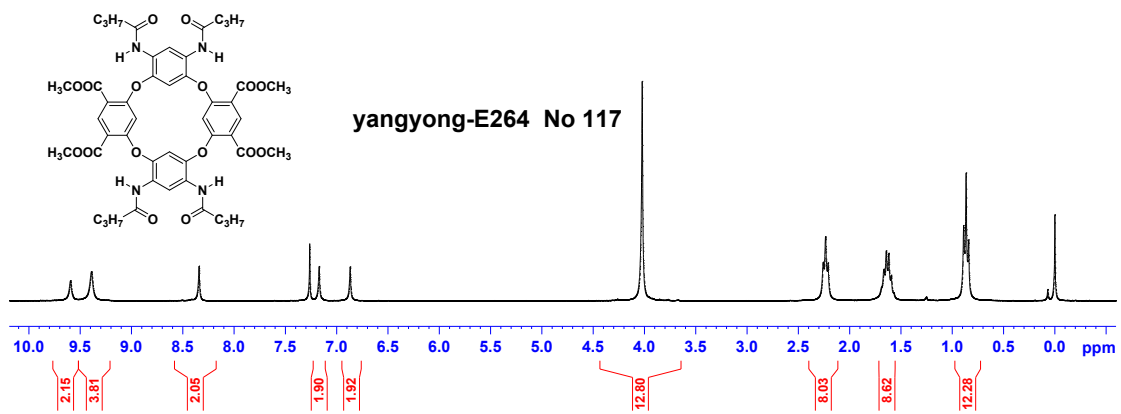

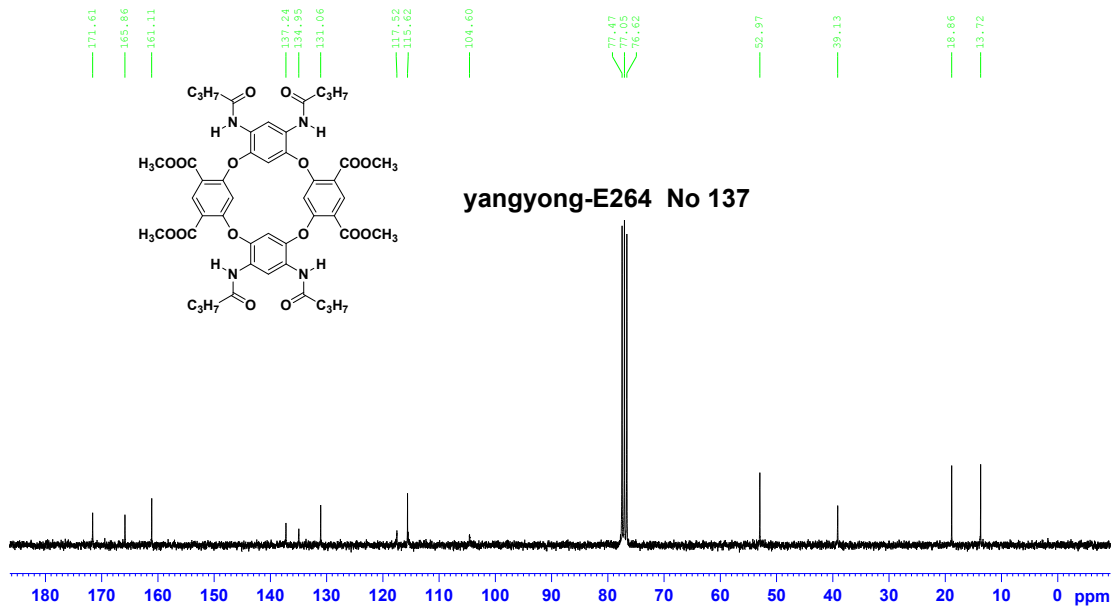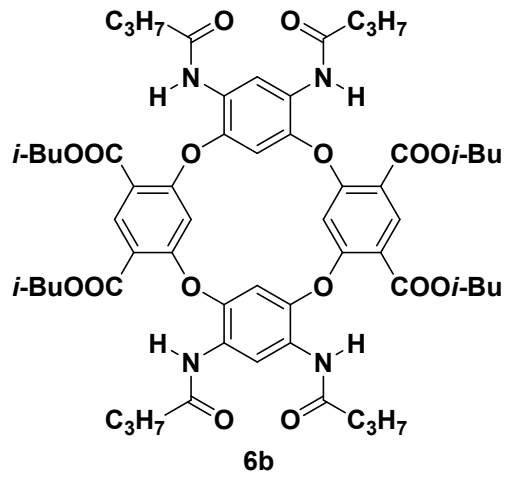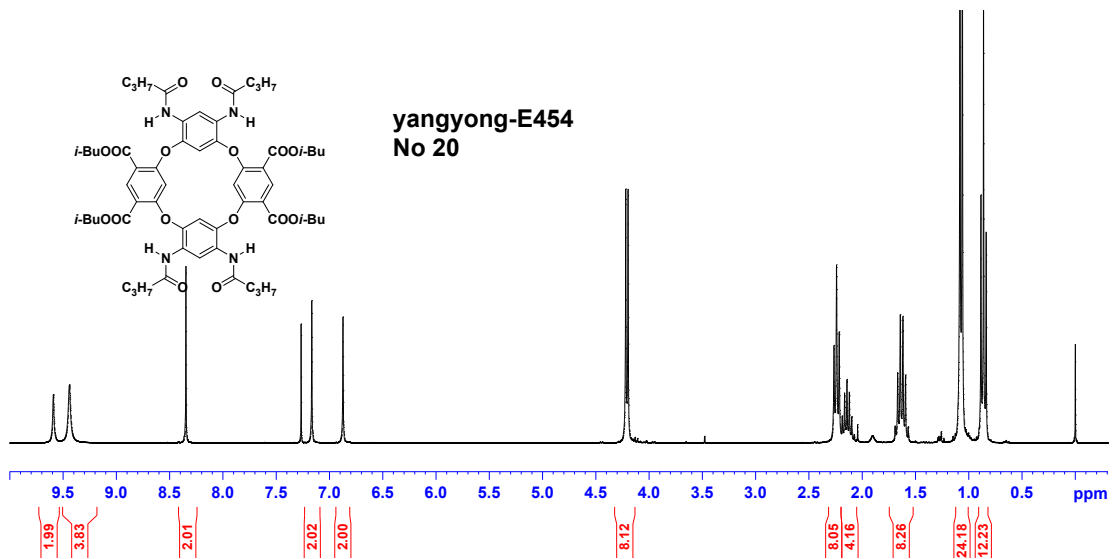

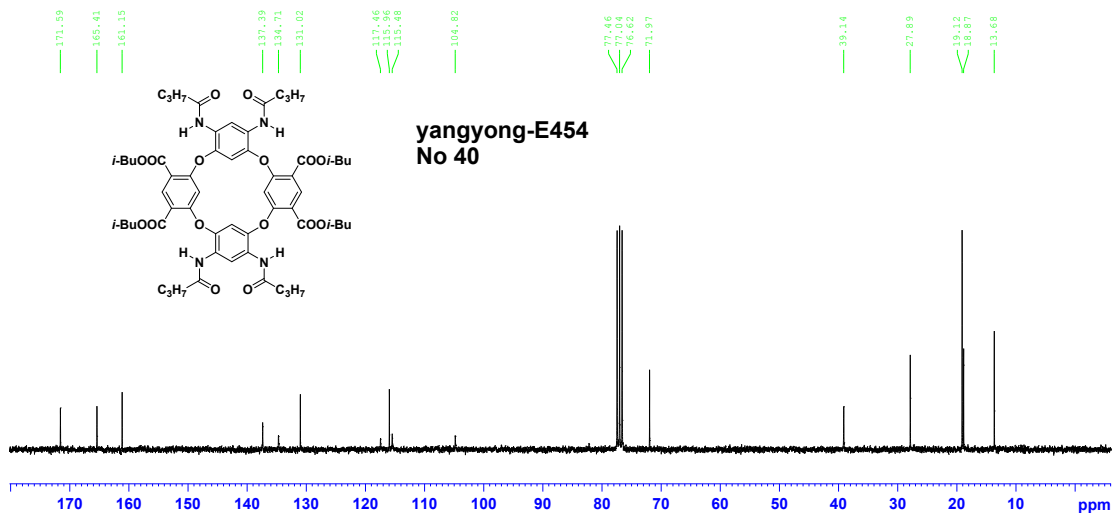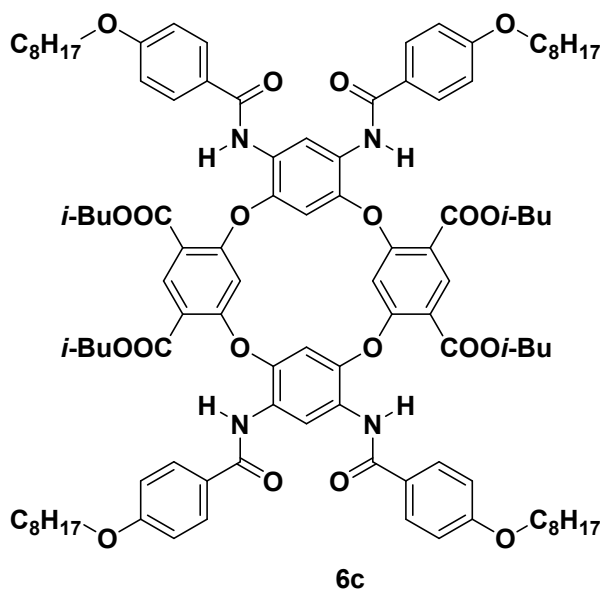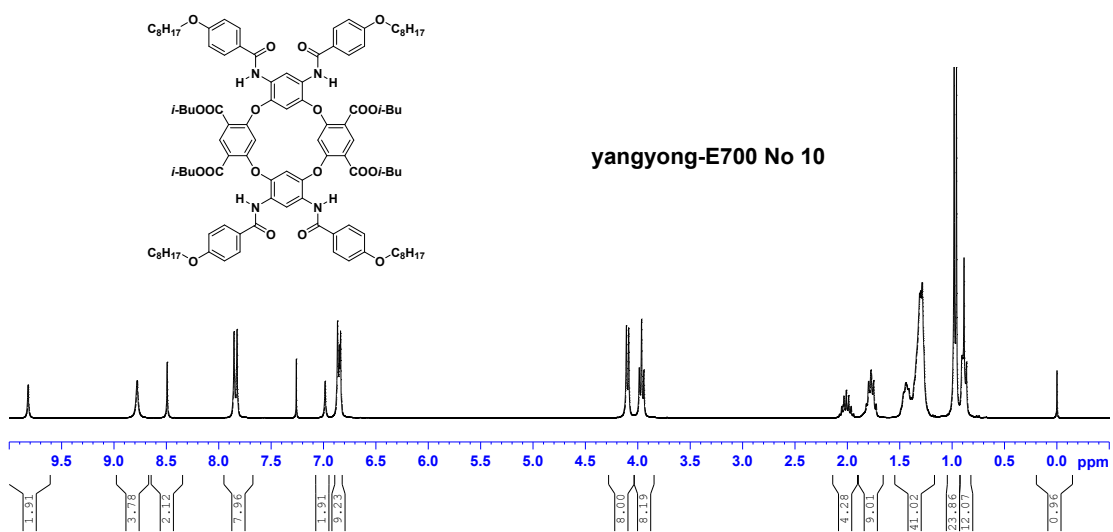



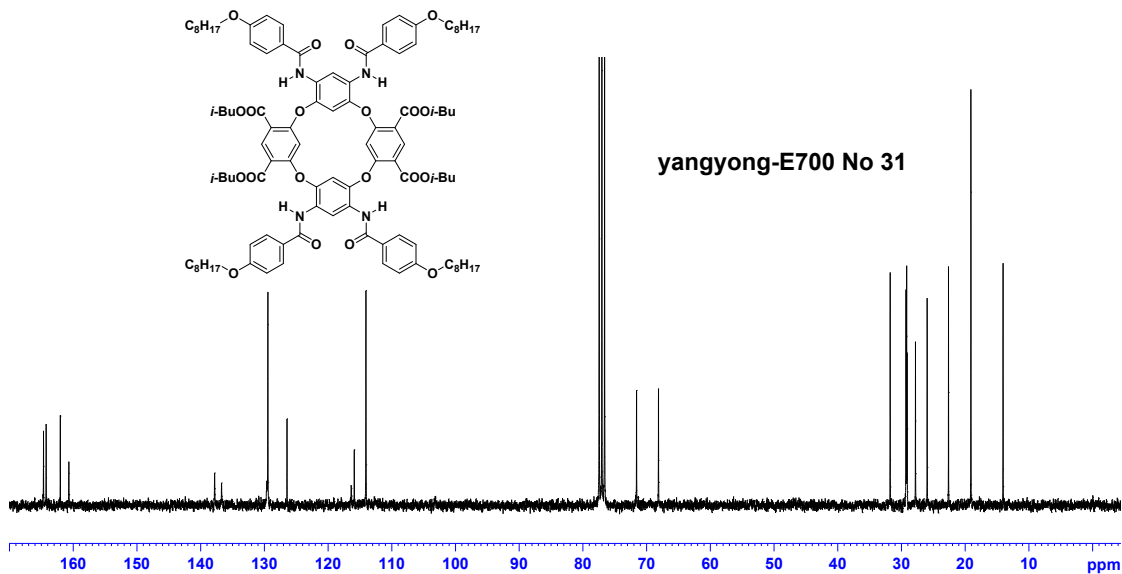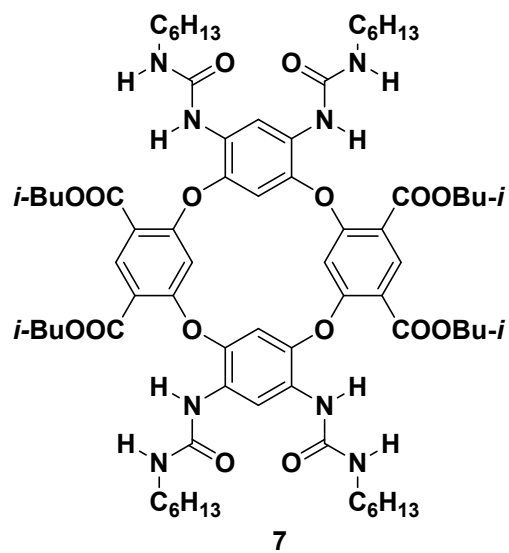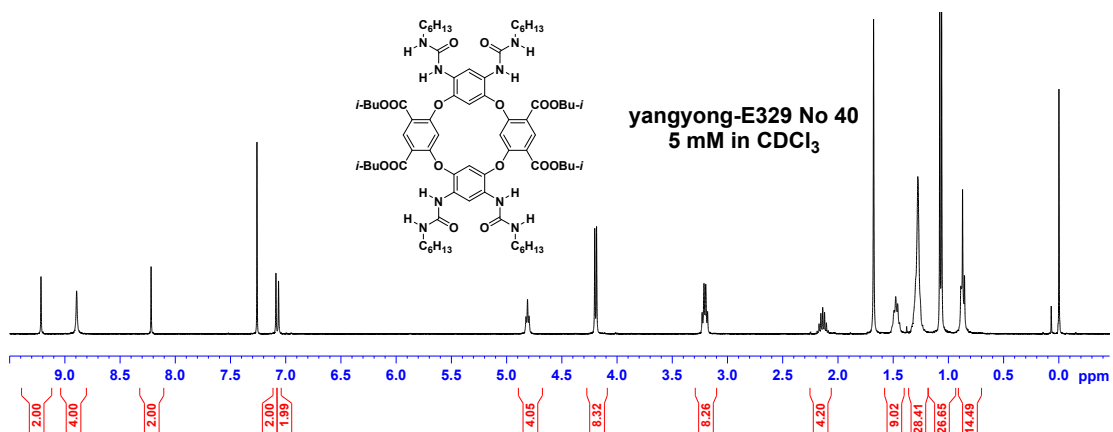

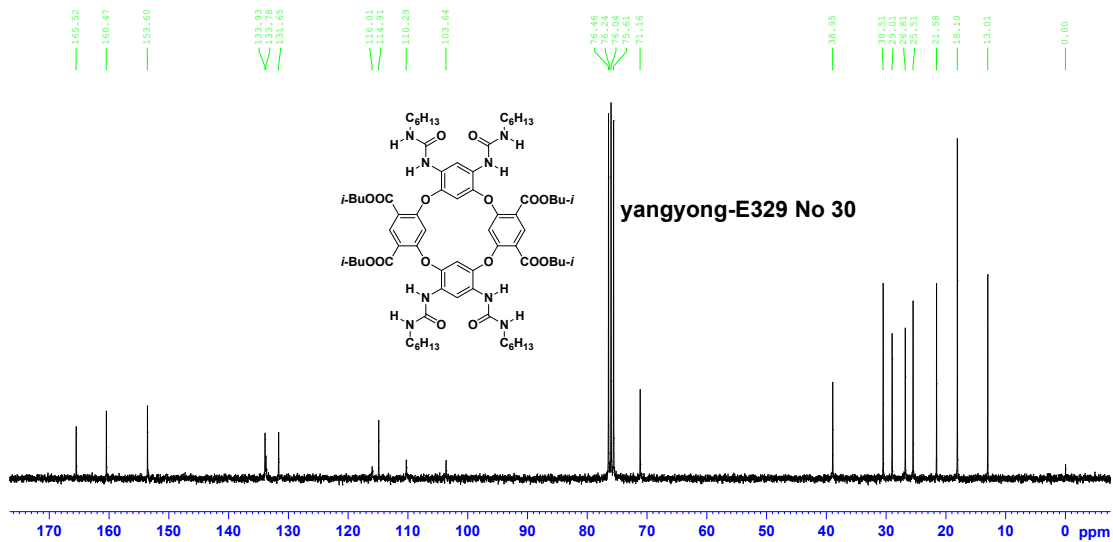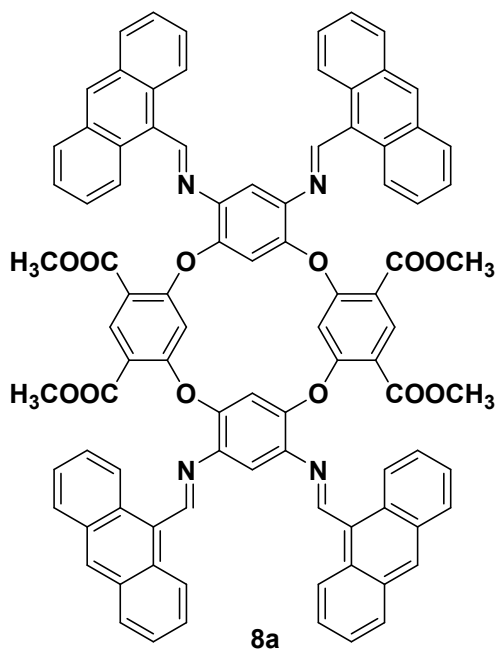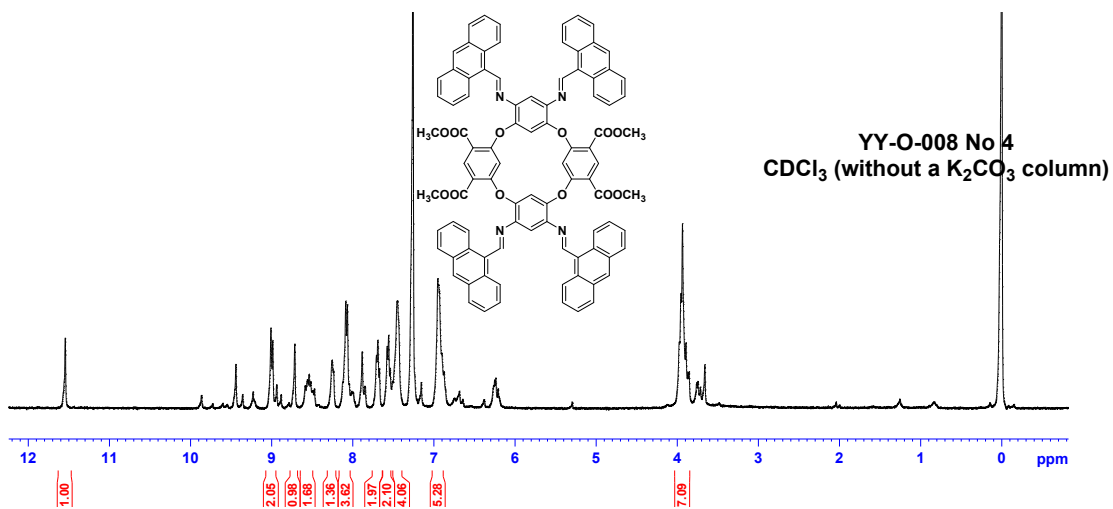

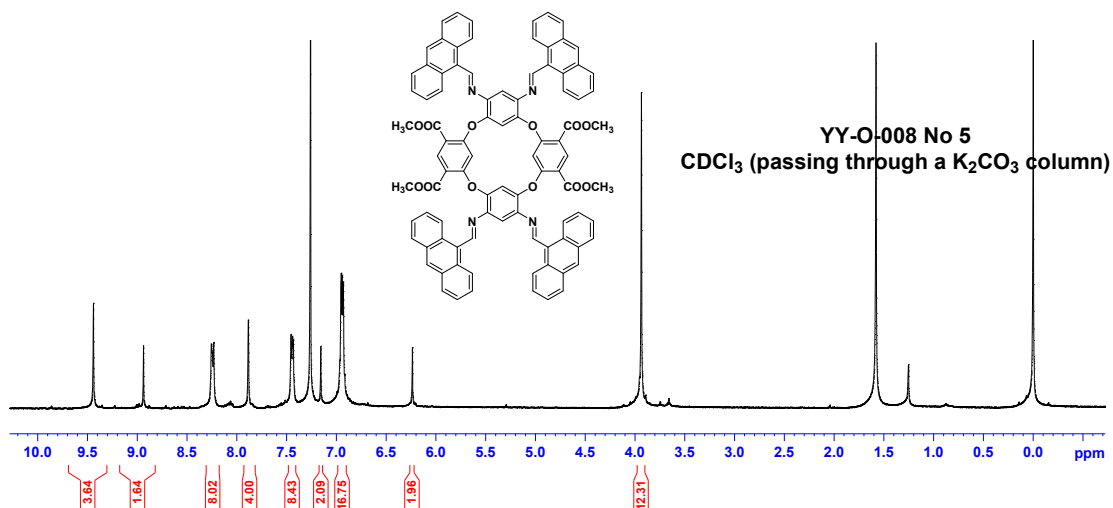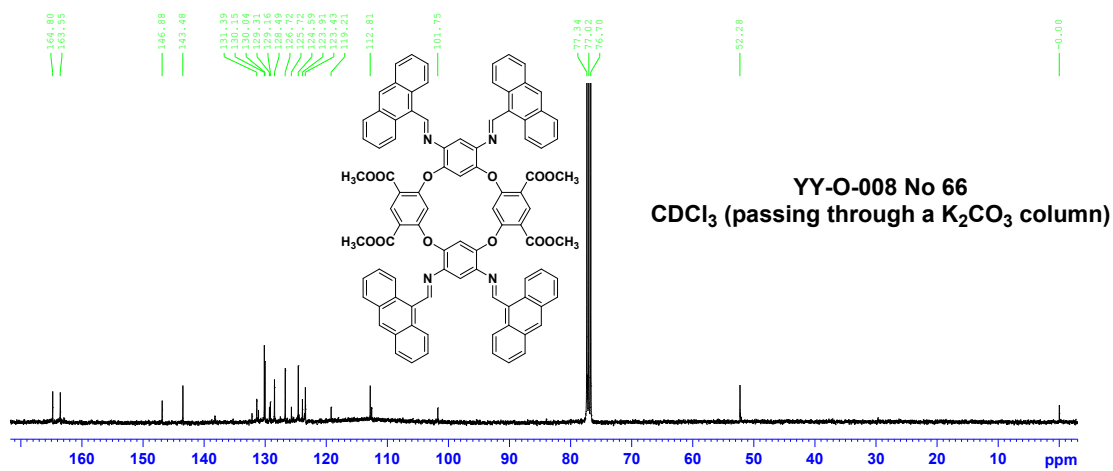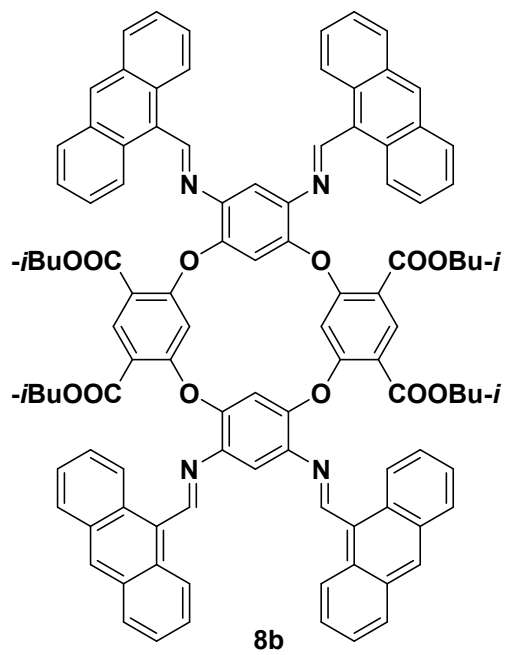

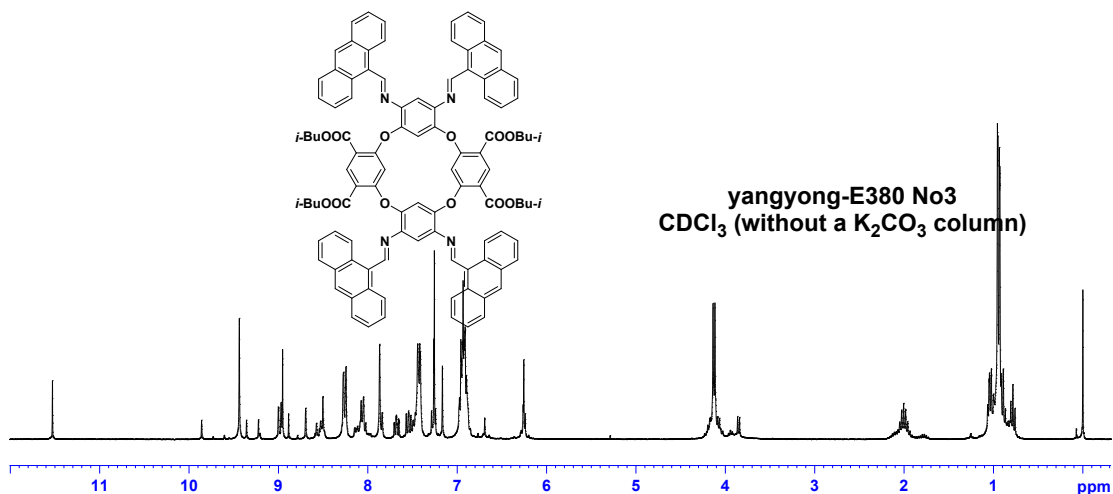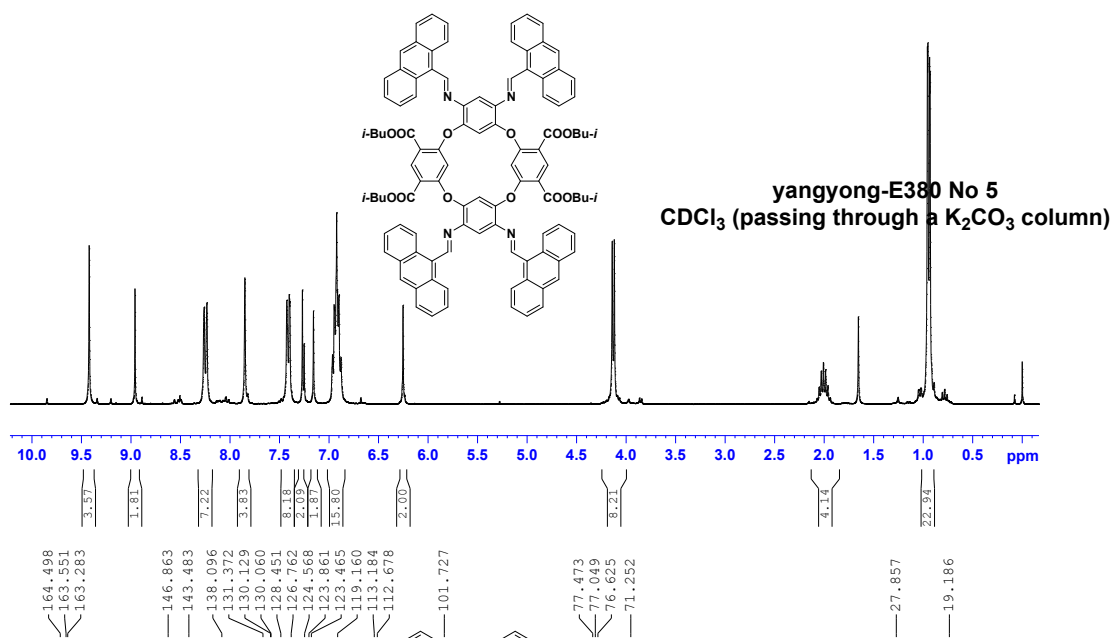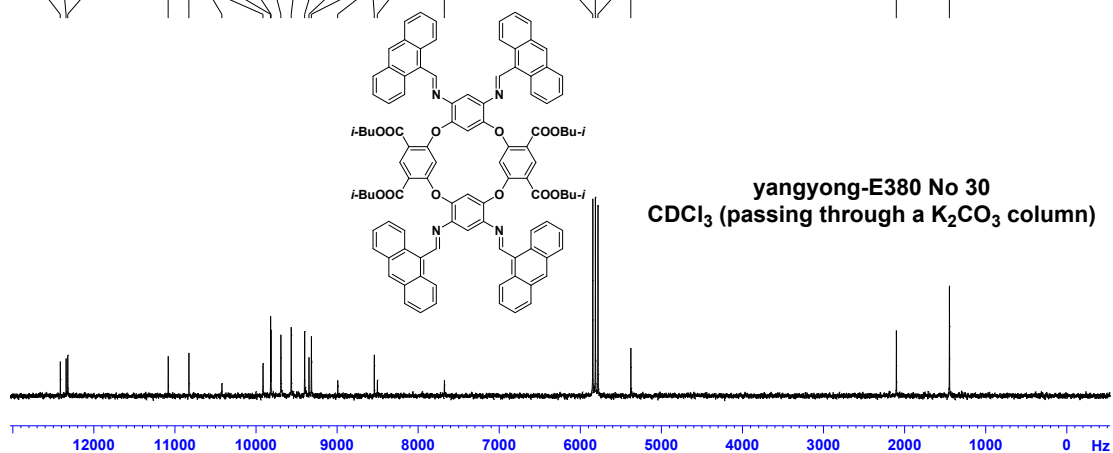

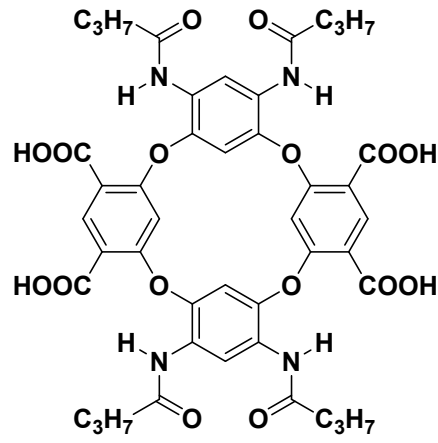

9a

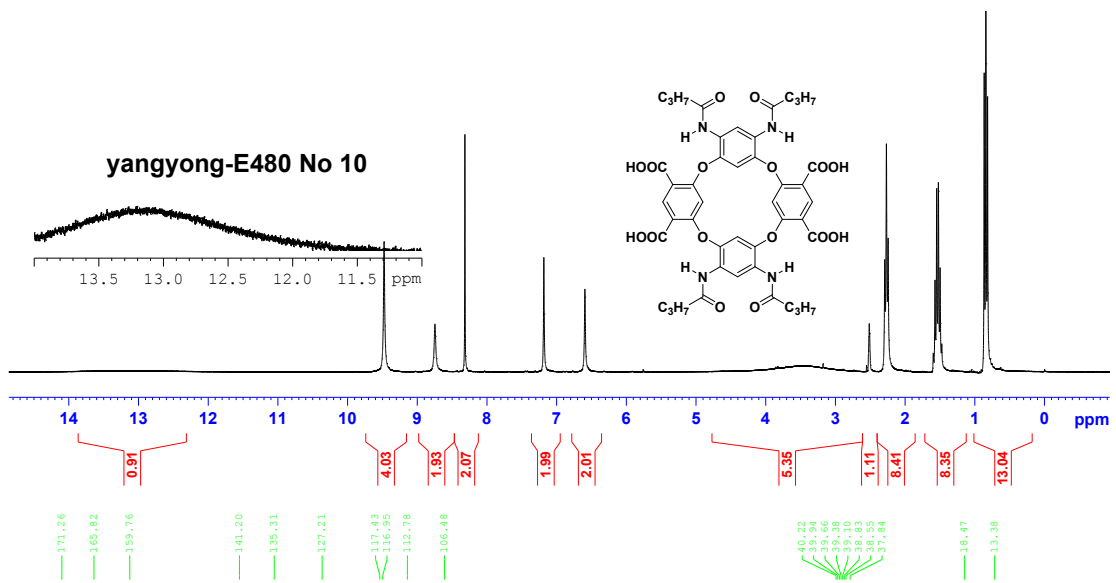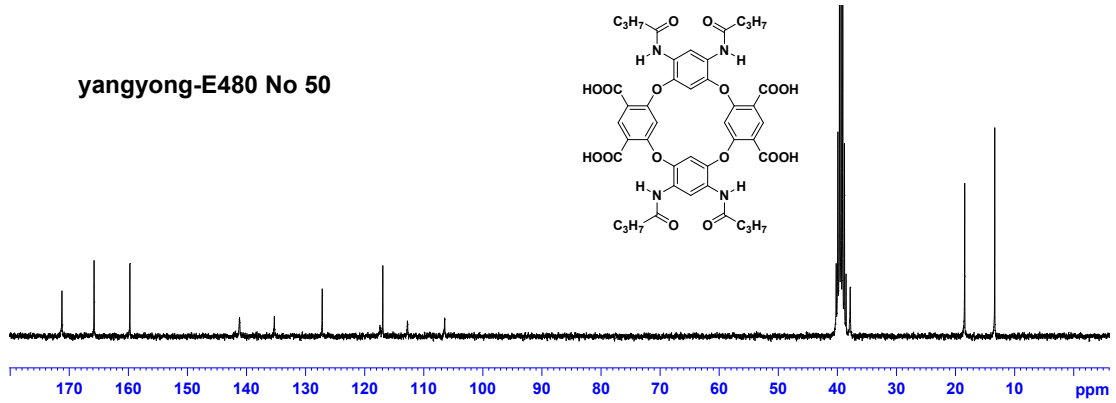

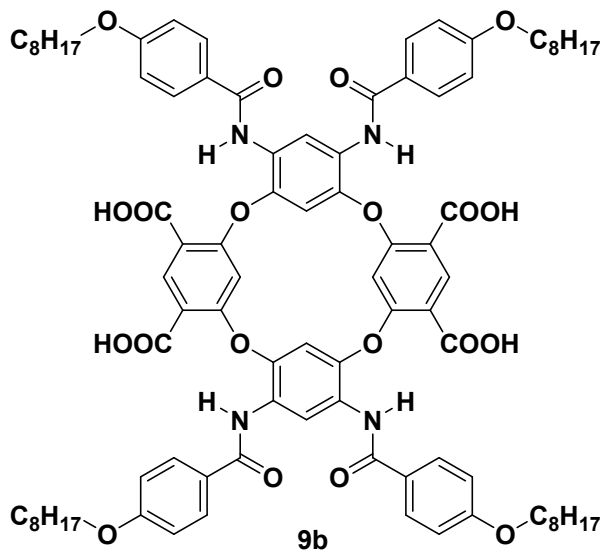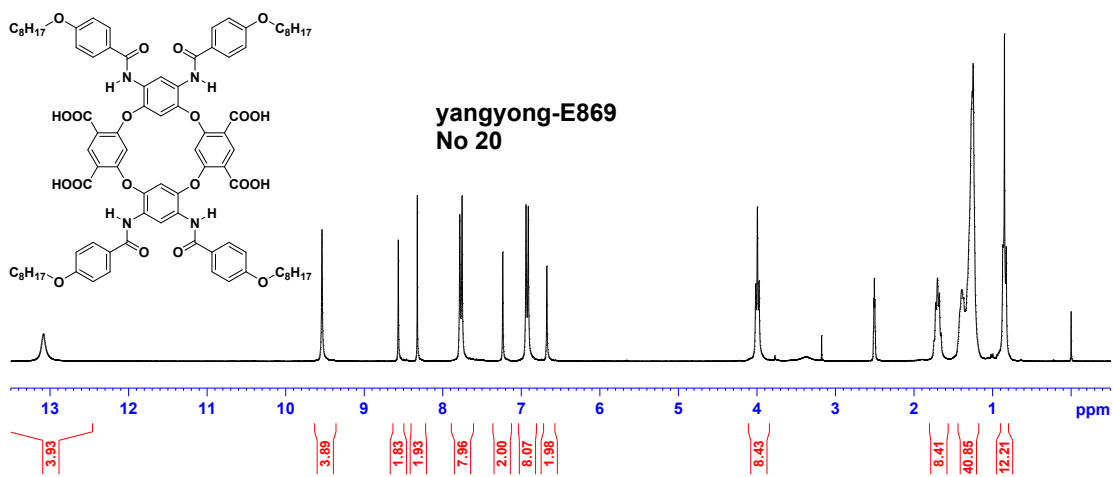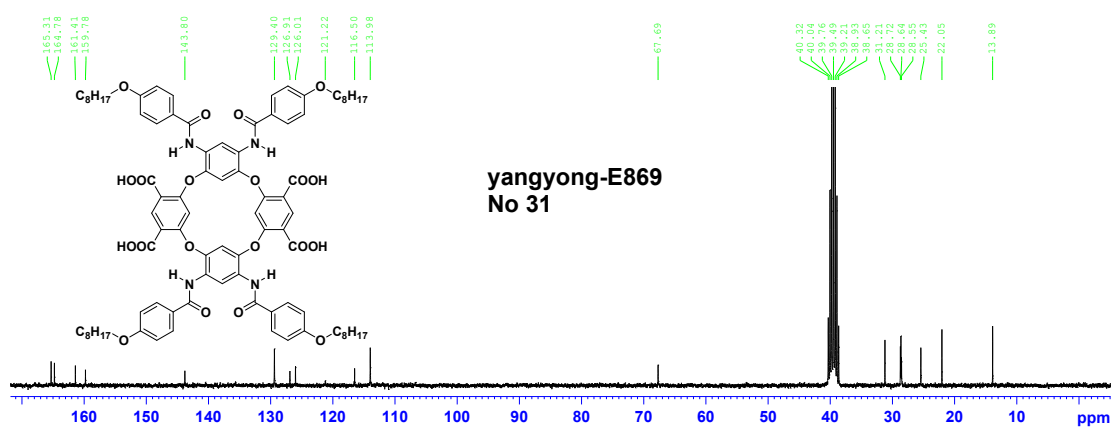

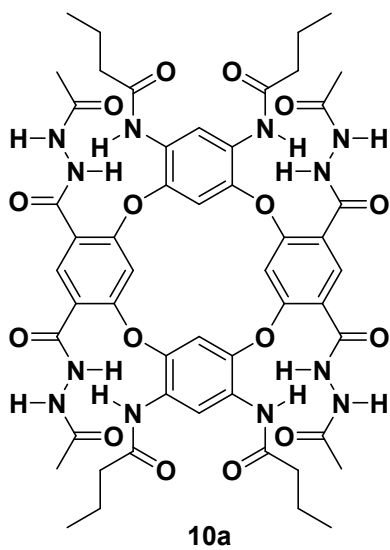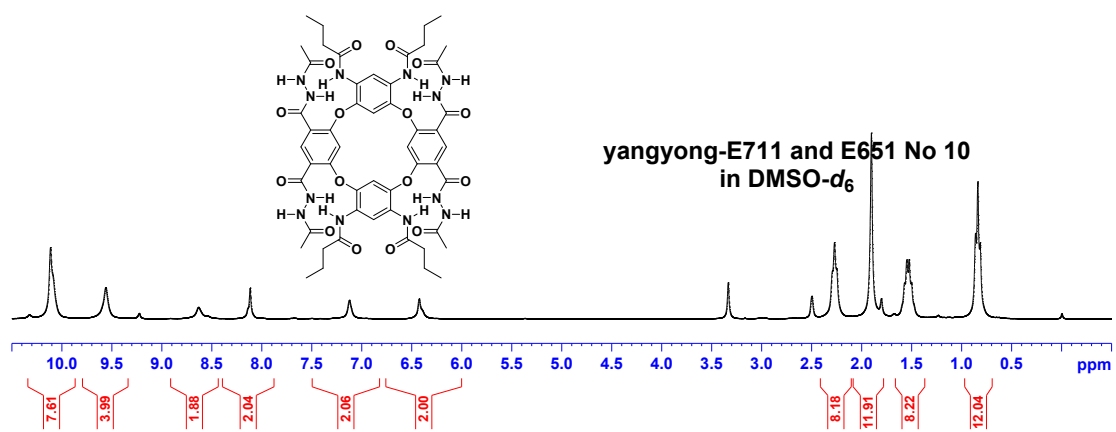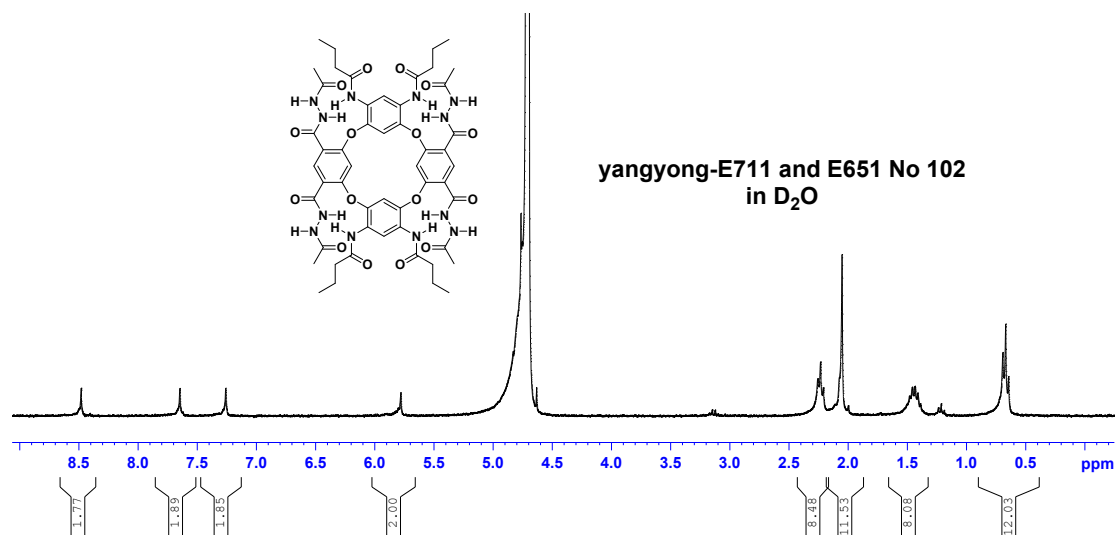

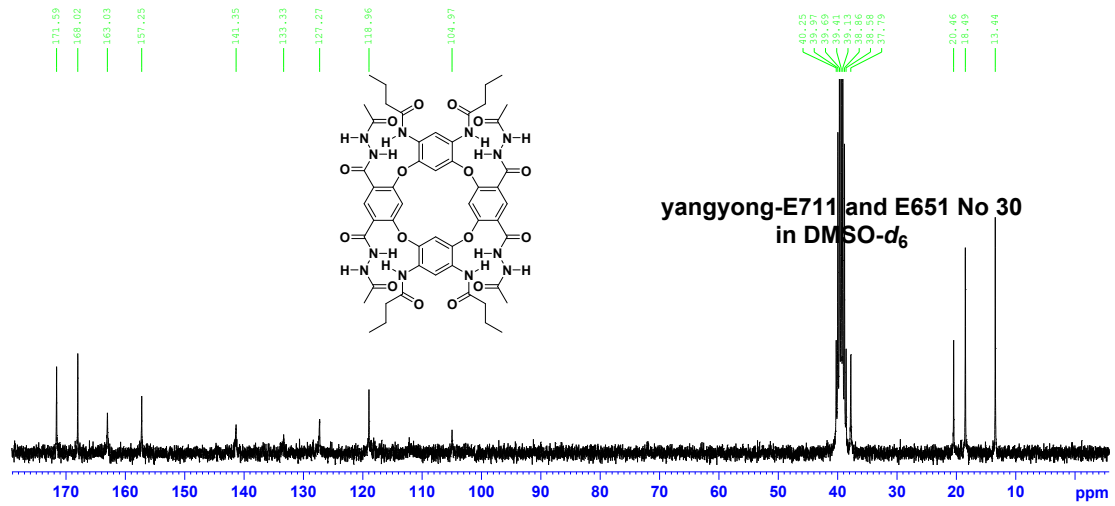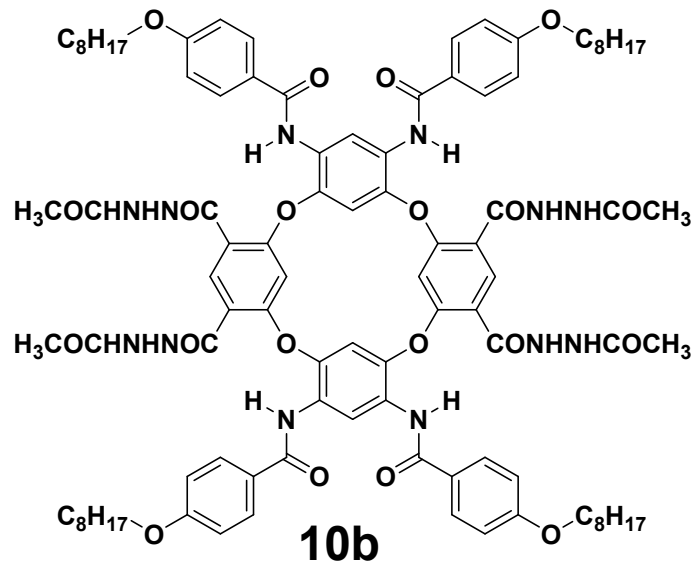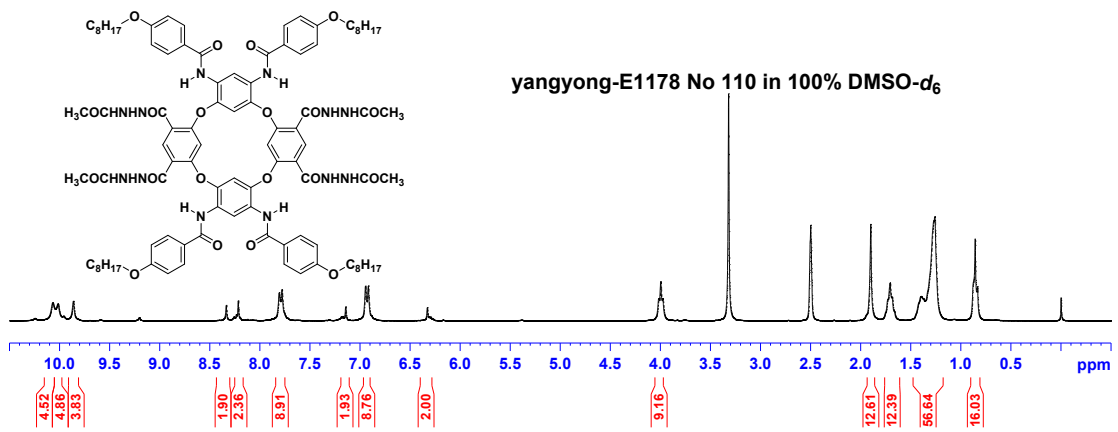



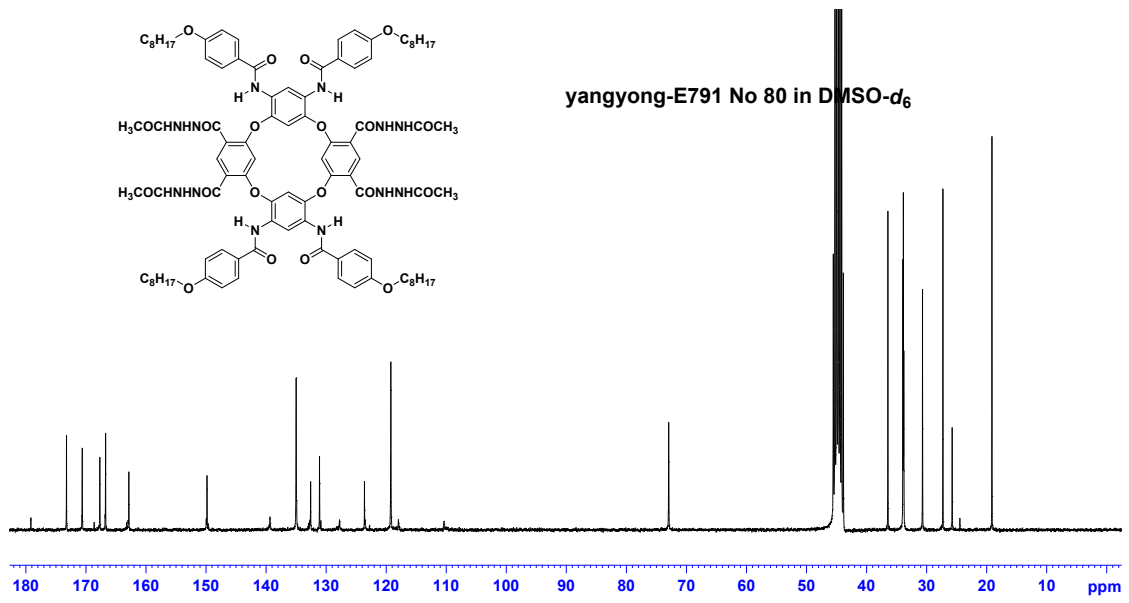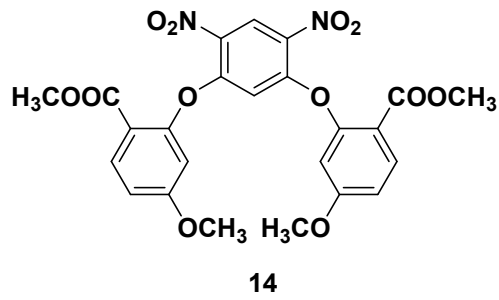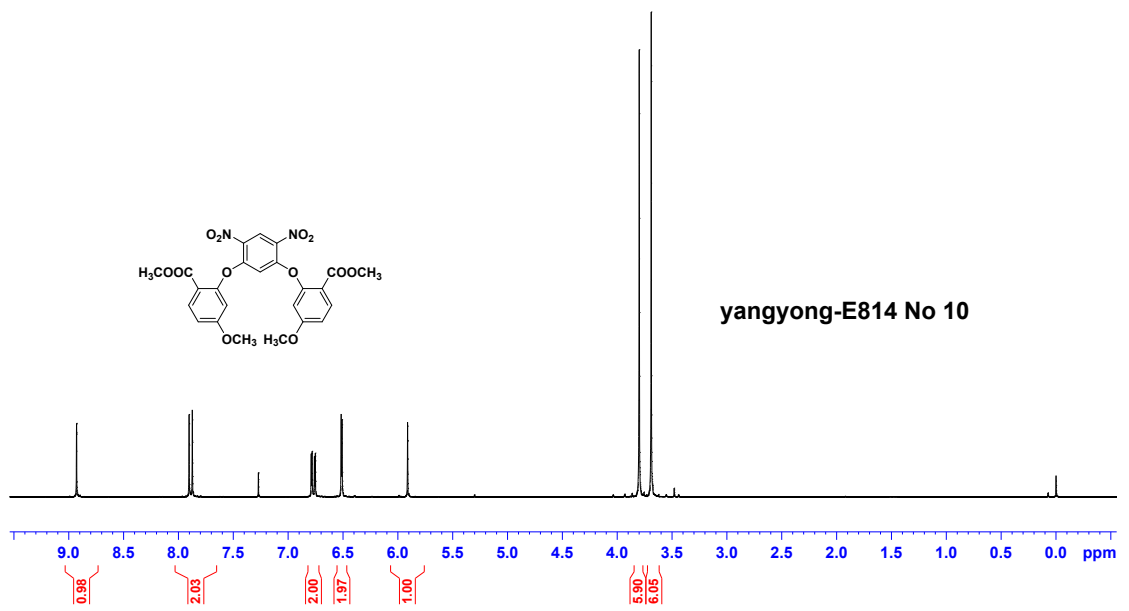

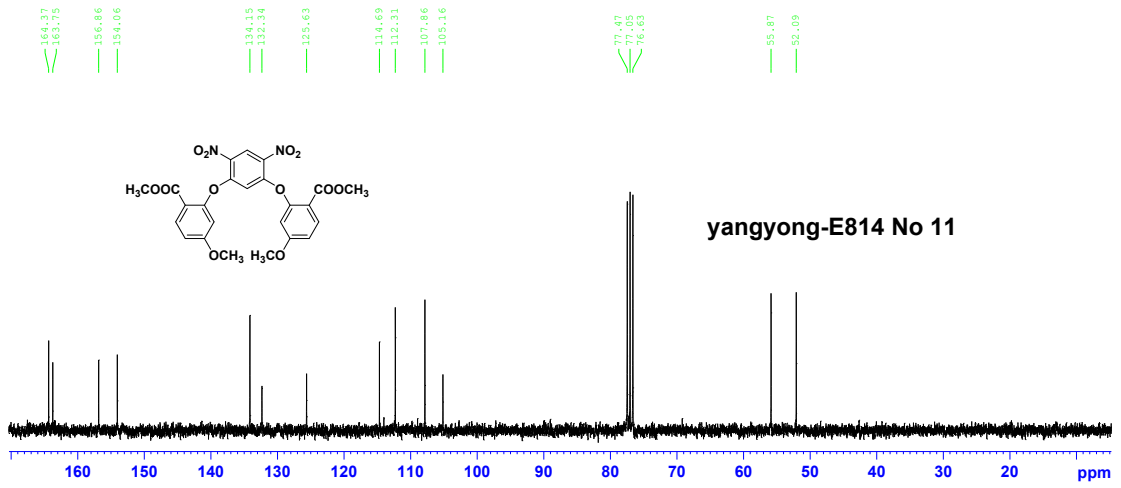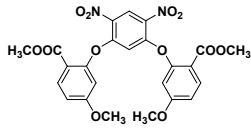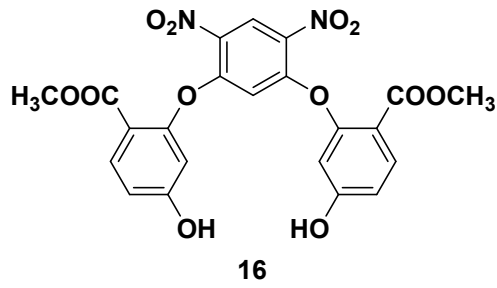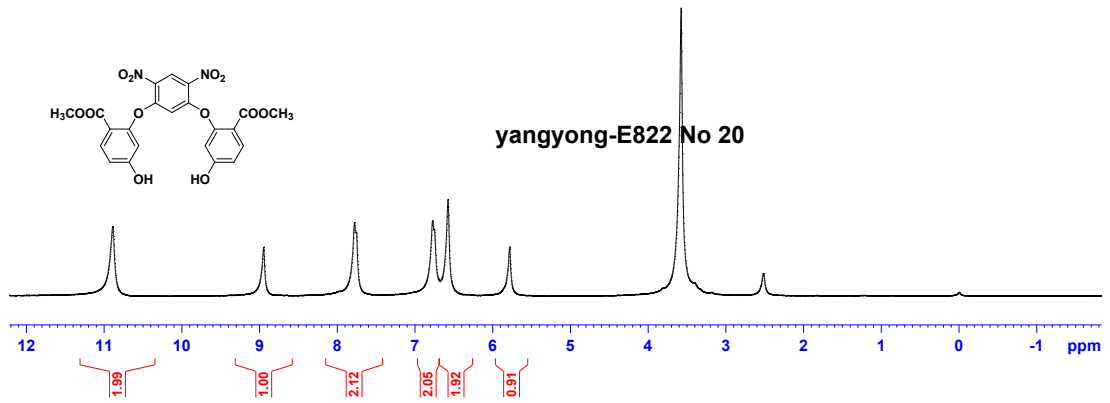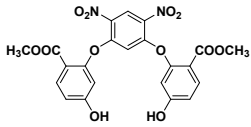

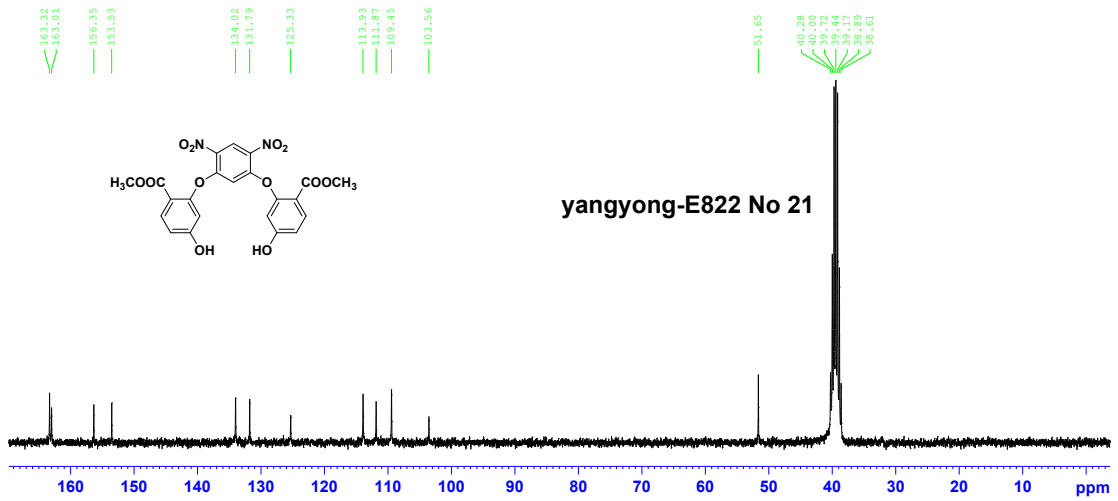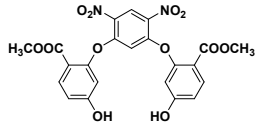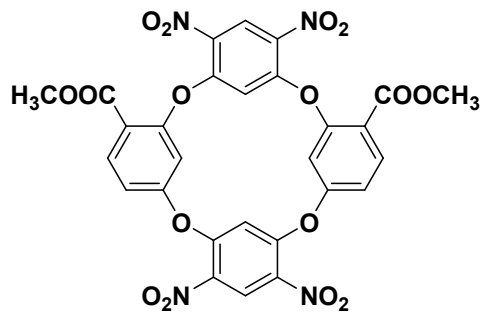

17

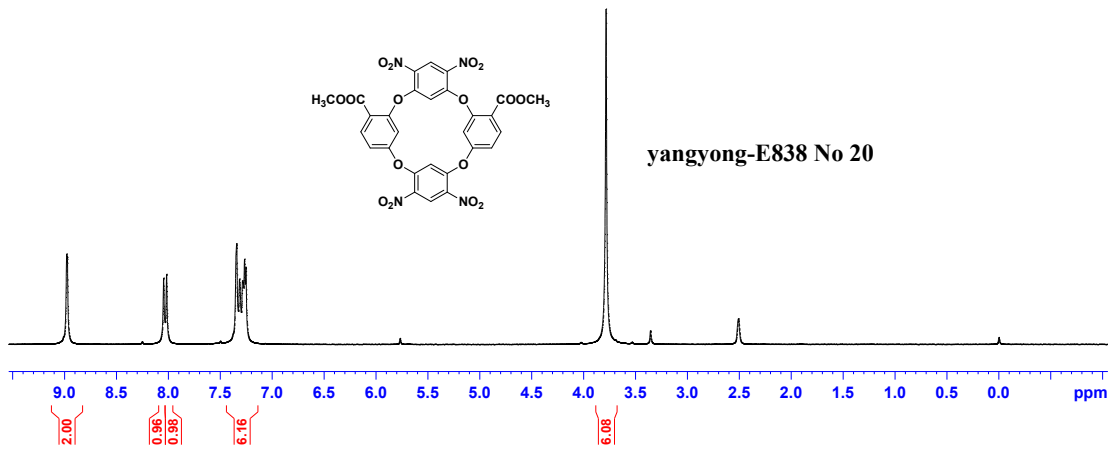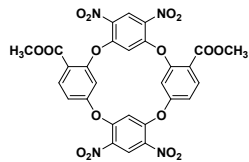



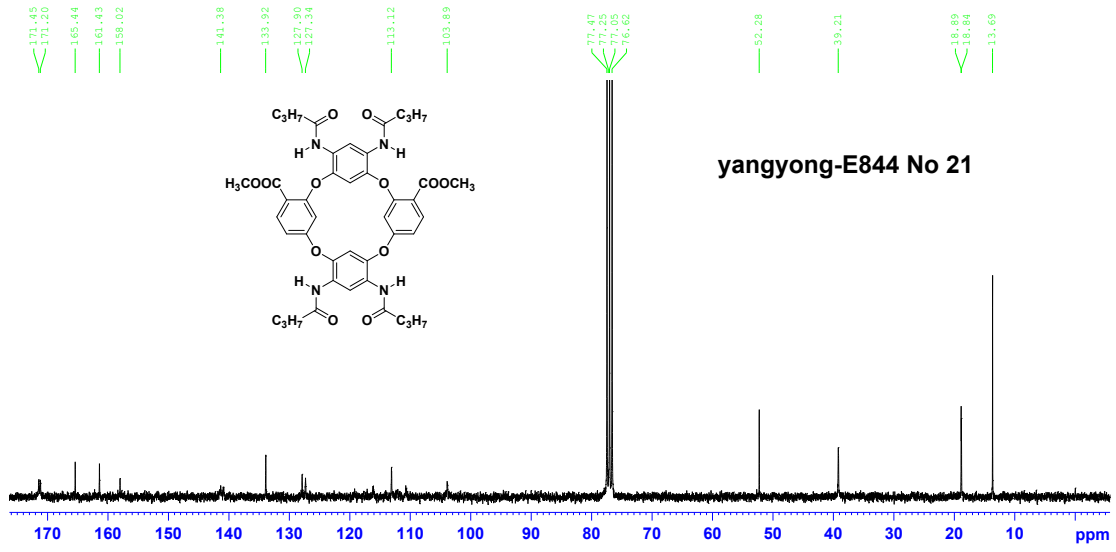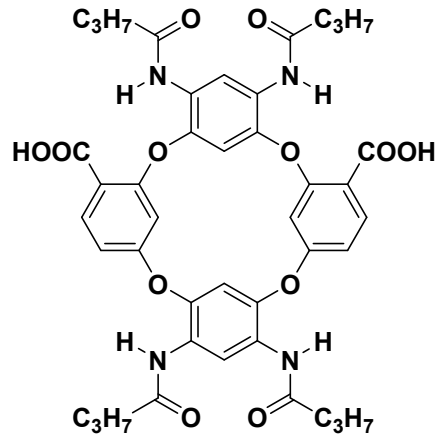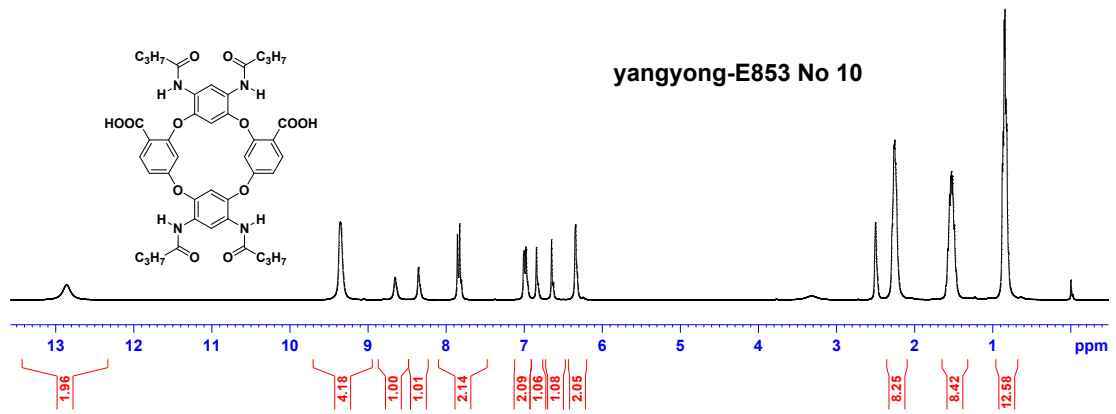



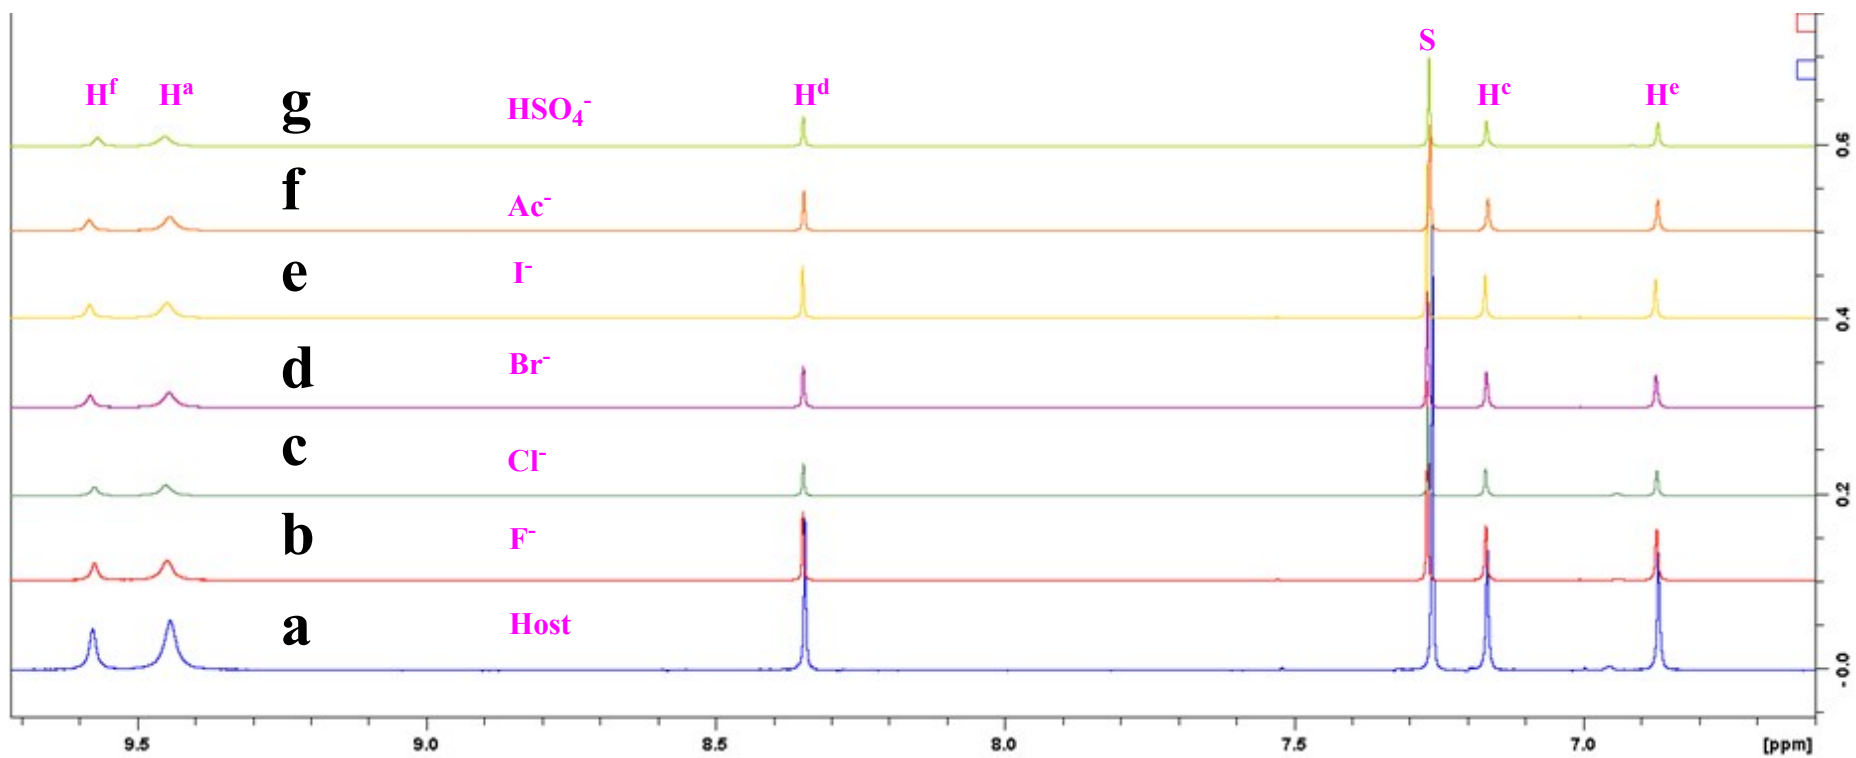

**Fig. S1.** Stacked partial spectra for 5 mM **6b** in CDCl<sub>3</sub> (a), with 15 mM Bu<sub>4</sub>N<sup>+</sup>F<sup>-</sup> (b), with 15 mM Bu<sub>4</sub>N<sup>+</sup>Cl<sup>-</sup> (c), with 15 mM Bu<sub>4</sub>N<sup>+</sup>Br<sup>-</sup> (d), with 15 mM Bu<sub>4</sub>N<sup>+</sup>I<sup>-</sup> (e), with 15 mM Bu<sub>4</sub>N<sup>+</sup>Ac<sup>-</sup> (f), with 15 mM Bu<sub>4</sub>N<sup>+</sup>HSO<sub>4</sub><sup>-</sup> (g), 298 K, 400 MHz.

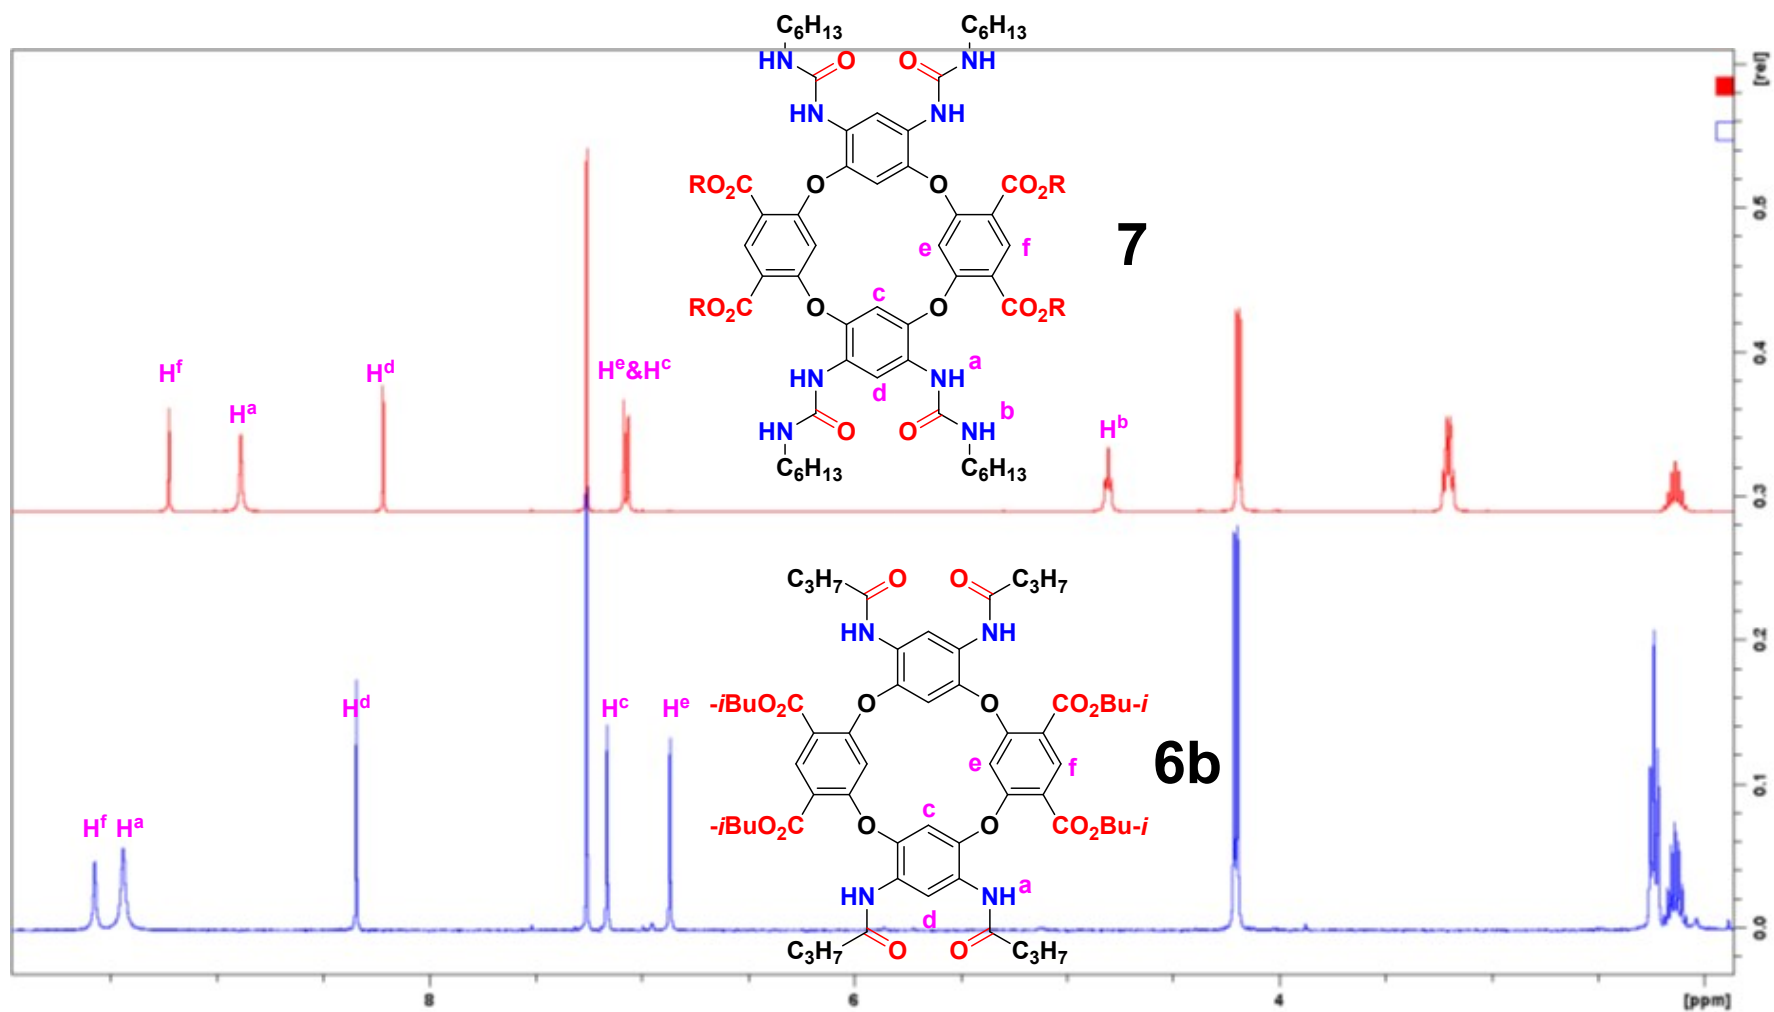

Fig. S2. Stacked partial spectra for 5 mM **6b** (bottom) and 5 mM **7** (up), CDCl<sub>3</sub>, 298 K, 400 MHz.



Determination of association constant ( $K_a$ ) of Tetraureido Oxacalix[4]arene **7** and the anion guests  $F^-$ ,  $Cl^-$ ,  $Br^-$ ,  $I^-$ ,  $Ac^-$ , and  $HSO_4^-$ , from UV-vis titration data was based on the following equation.<sup>S1-S2</sup>

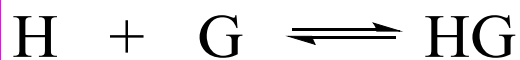

$$K_a = \frac{[HG]}{[H][G]}$$

$$[H] = [H]_0 - [HG]$$

$$[G] = [G]_0 - [HG]$$

$$[HG] = \frac{[G]_0 + [H]_0 + \frac{1}{K_a} - \sqrt{([G]_0 + [H]_0 + \frac{1}{K_a})^2 - 4[G]_0[H]_0}}{2}$$

$$A_{obs} = \varepsilon_1[H] + \varepsilon_2[HG]$$

$$= \varepsilon_1([H]_0 - [HG]) + \varepsilon_2[HG]$$

$$= \varepsilon_1[H]_0 + (\varepsilon_2 - \varepsilon_1)[HG] \quad A_0 = \varepsilon_1[H]_0$$

$$A_{obs} - A_0 = (\varepsilon_2 - \varepsilon_1)[HG]$$

$$\Delta A = A_{obs} - A_0 \quad C = \varepsilon_2 - \varepsilon_1$$

$$\Delta A = C \frac{[G]_0 + [H]_0 + \frac{1}{K_a} - \sqrt{([G]_0 + [H]_0 + \frac{1}{K_a})^2 - 4[G]_0[H]_0}}{2}$$

(Eq. S1)

$[H]_0$ : the initial concentration of Host

$[H]$ : the concentration of free Host

$[G]_0$ : the initial concentration of Guest

$[G]$ : the concentration of free Guest

$[HG]$ : the concentration of Host-Guest complex

$K_a$ : association constant

$\varepsilon_1$ : molar absorption coefficient of Host

$\varepsilon_2$ : molar absorption coefficient of Host-Guest complex HG

$A_0$ : the initial absorption value of Host

$A_{obs}$ : absorption value measured for each titration

$\Delta A$ : changes for absorption value

$C$ : constant

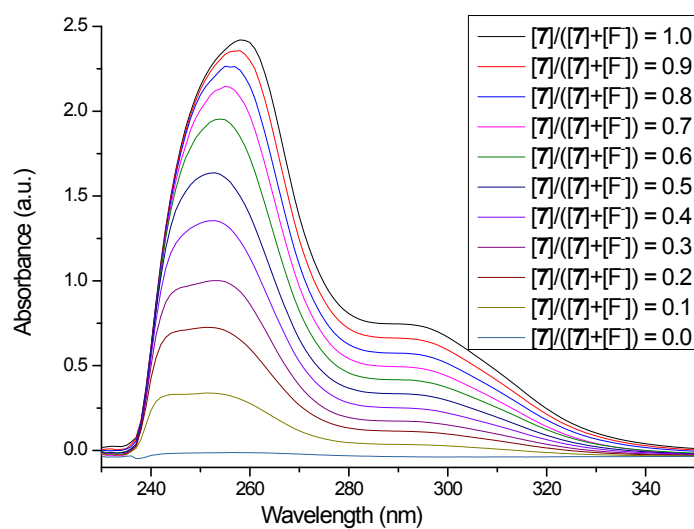

**Fig. S3.** UV-vis spectra of mixtures of host **7** and guest  $\text{Bu}_4\text{N}^+\text{F}^-$  with different ratios in  $\text{CHCl}_3$ , with the total concentration fixed at  $5 \times 10^{-5}$  M.

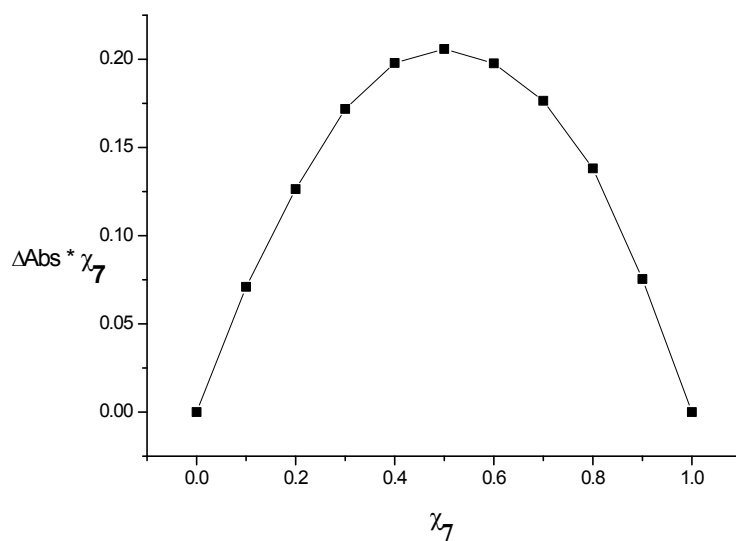

**Fig. S4.** Job-plot for the complex between host **7** and guest  $\text{Bu}_4\text{N}^+\text{F}^-$  in  $\text{CHCl}_3$  using UV-vis absorption values at  $\lambda = 290$  nm, showing a 1:1 stoichiometry.

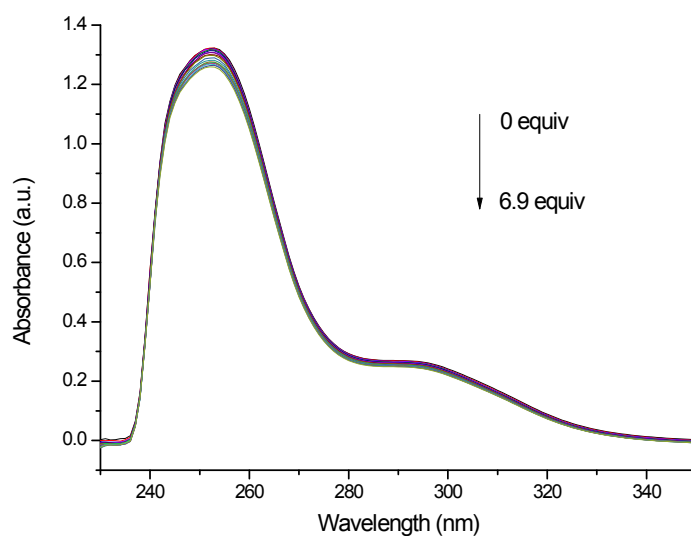

**Fig. S5.** Titration curves of host **7** (fixed at  $2 \times 10^{-5}$  M in  $\text{CHCl}_3$ ) with 0-6.9 equivalents of guest  $\text{Bu}_4\text{N}^+\text{F}^-$ , 298 K.

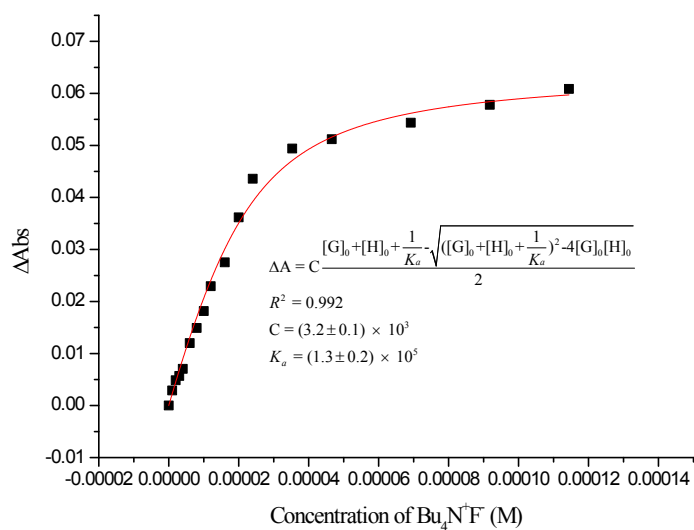

**Fig. S6.** Plot of the absorption intensity changes at  $\lambda = 254$  nm vs the guest concentration. The red line was obtained from non-linear curve-fitting using Eq. S1, yielding an association constant  $K_a = (1.3 \pm 0.2) \times 10^5 \text{ M}^{-1}$ .

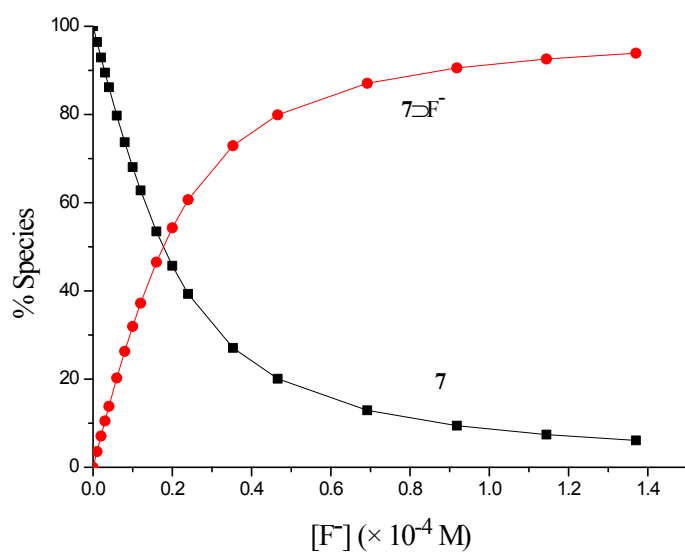

**Fig. S7.** Distribution diagram between **7** and **7-F<sup>-</sup>** during the spectrophotometric titration, calculated using UV-vis titration absorption data at  $\lambda = 254$  nm.

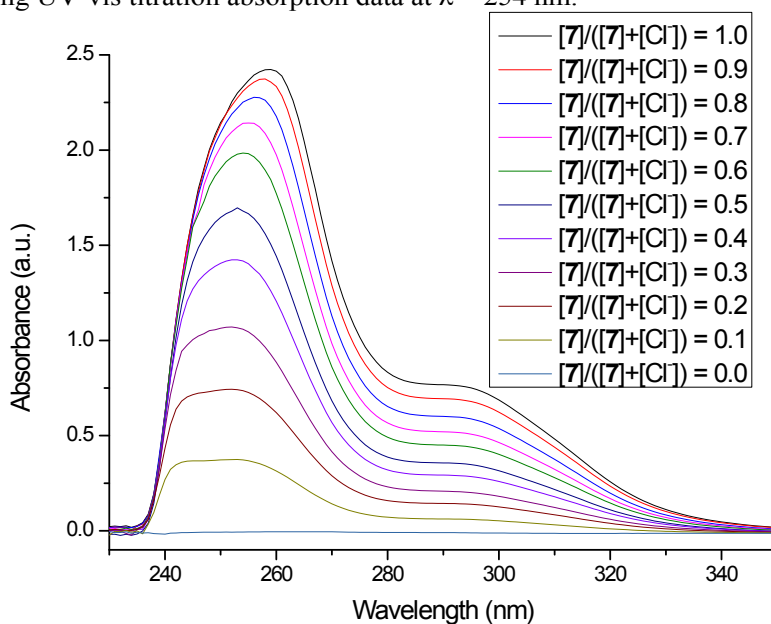

**Fig. S8.** UV-vis spectra of mixtures of host **7** and guest  $\text{Bu}_4\text{N}^+\text{Cl}^-$  with different ratios in  $\text{CHCl}_3$ , with the total concentration fixed at  $5 \times 10^{-5}$  M.

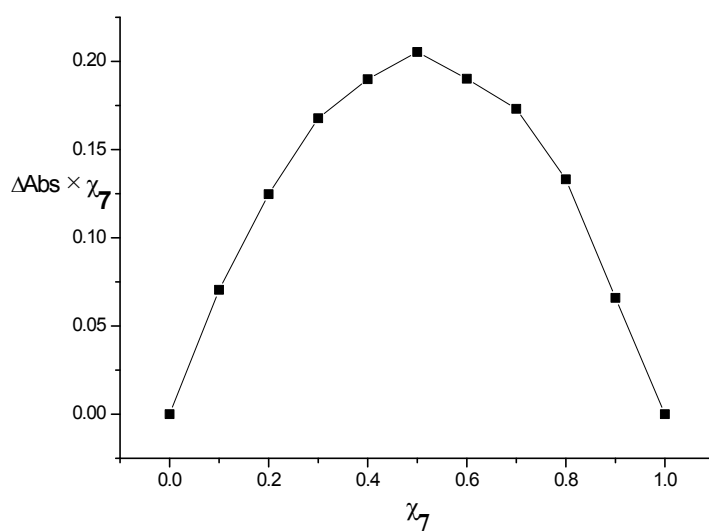

**Fig. S9.** Job-plot for the complex between host **7** and guest  $\text{Bu}_4\text{N}^+\text{Cl}^-$  in  $\text{CHCl}_3$  using UV-vis absorption values at  $\lambda = 290$  nm, showing a 1:1 stoichiometry.

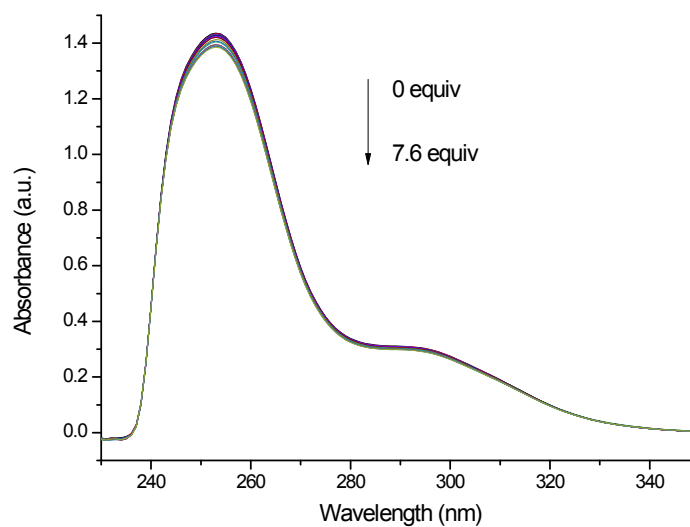

**Fig. S10.** Titration curves of host **7** (fixed at  $2 \times 10^{-5}$  M in  $\text{CHCl}_3$ ) with 0-7.6 equivalents of guest  $\text{Bu}_4\text{N}^+\text{Cl}^-$ , 298 K.

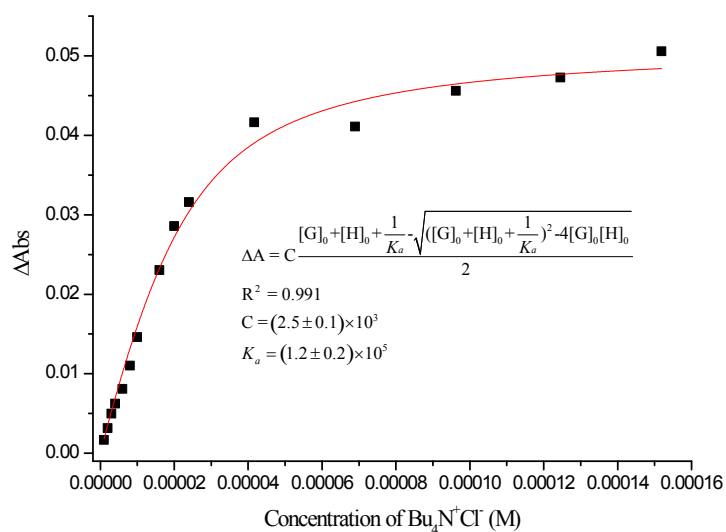

**Fig. S11.** Plot of the absorption intensity changes at  $\lambda = 253$  nm vs the guest concentration. The red line was obtained from non-linear curve-fitting using Eq. S1, yielding an association constant  $K_a = (1.2 \pm 0.2) \times 10^5 \text{ M}^{-1}$ .

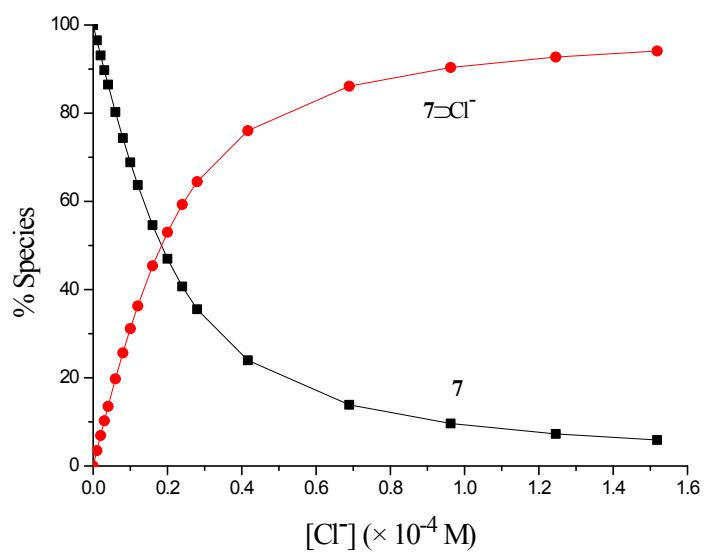

**Fig. S12.** Distribution diagram between **7** and **7=Cl<sup>-</sup>** during the spectrophotometric titration, calculated using UV-vis titration absorption data at  $\lambda = 253$  nm.

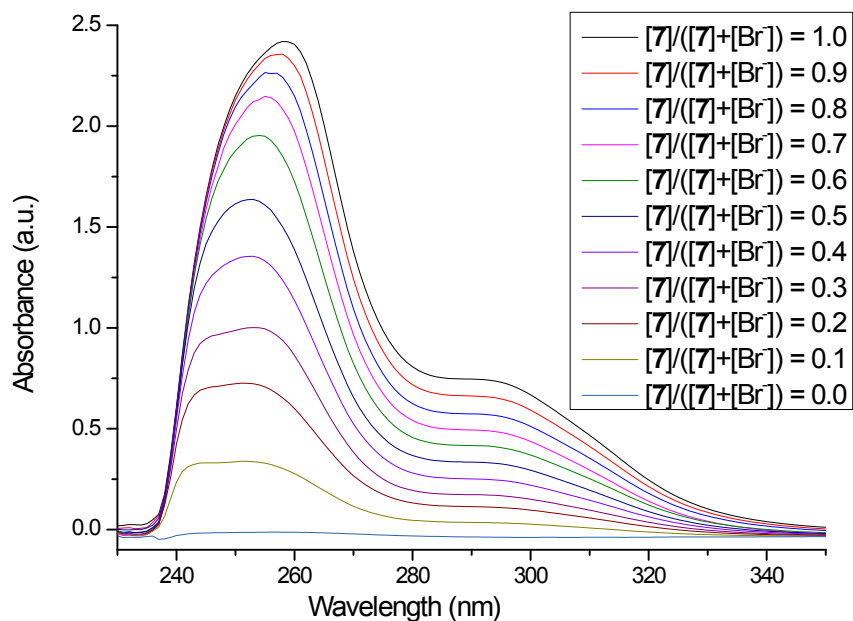

**Fig. S13.** UV-vis spectra of mixtures of host 7 and guest  $\text{Bu}_4\text{N}^+\text{Br}^-$  with different ratios in  $\text{CHCl}_3$ , with the total concentration fixed at  $5 \times 10^{-5}$  M.

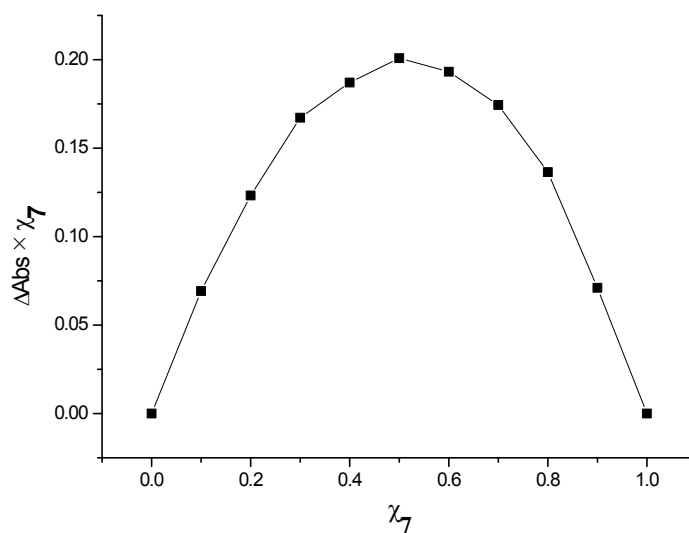

**Fig. S14.** Job-plot for the complex between host 7 and guest  $\text{Bu}_4\text{N}^+\text{Br}^-$  in  $\text{CHCl}_3$  using UV-vis absorption value at  $\lambda = 290$  nm, showing a 1:1 stoichiometry.

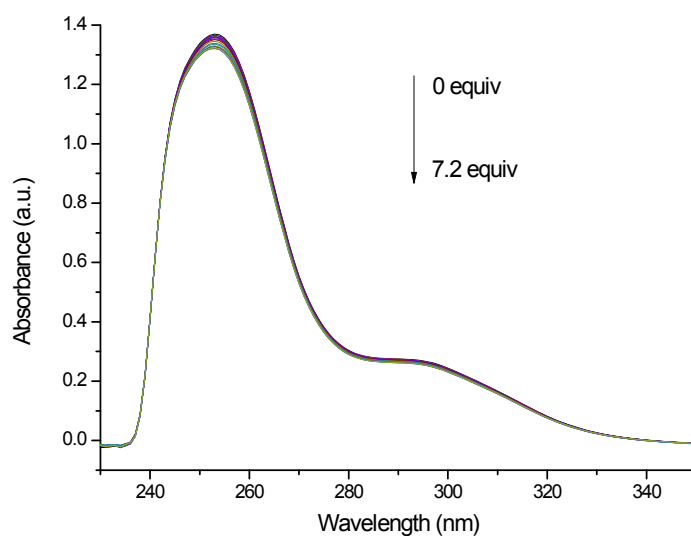

**Fig. S15.** Titration curves of host **7** (fixed at  $2 \times 10^{-5}$  M in  $\text{CHCl}_3$ ) with 0-7.2 equivalents of guest  $\text{Bu}_4\text{N}^+\text{Br}^-$ , 298 K.

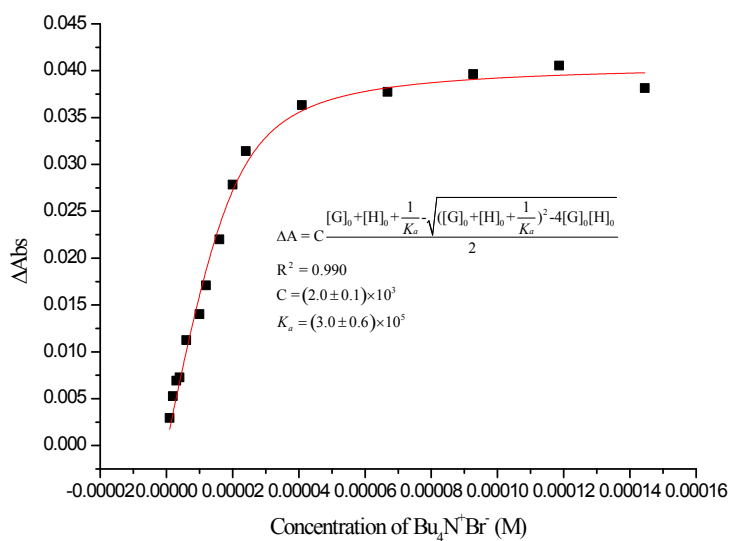

**Fig. S16.** Plot of the absorption intensity changes at  $\lambda = 250$  nm vs the guest concentration. The red line was obtained from non-linear curve-fitting using Eq. S1, yielding an association constant  $K_a = (3.0 \pm 0.6) \times 10^5 \text{ M}^{-1}$ .



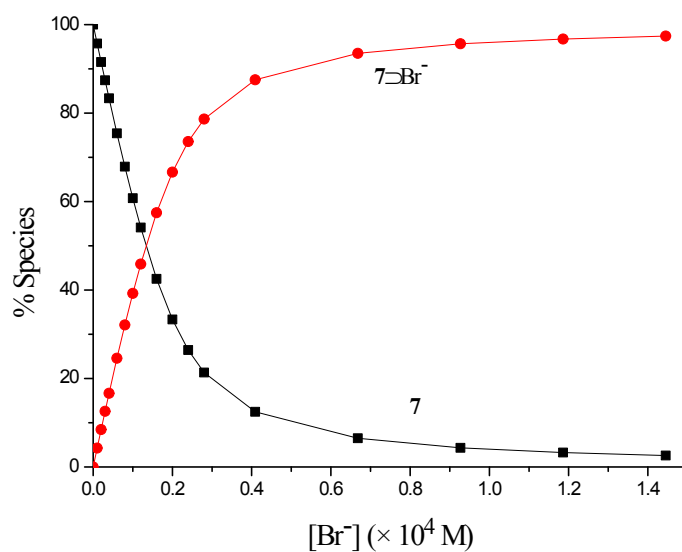

**Fig. S17.** Distribution diagram between **7** and **7⊃Br<sup>-</sup>** during the spectrophotometric titration, calculated using UV-vis titration absorption data at  $\lambda = 250$  nm.

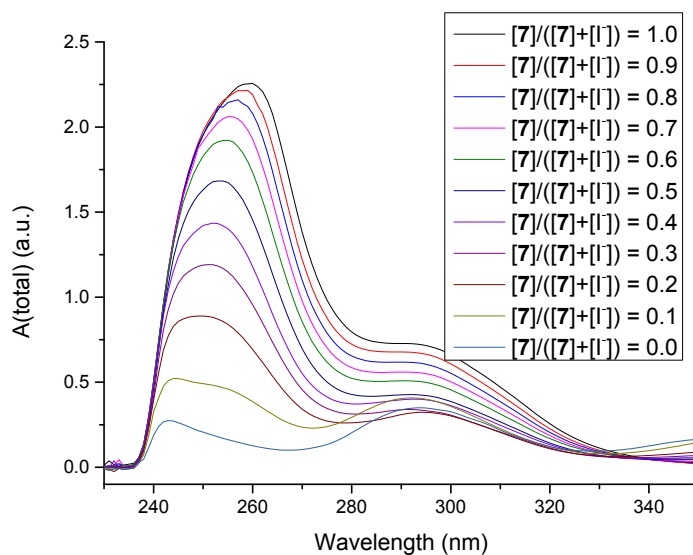

**Fig. S18.** UV-vis spectra of a mixture of host **7** and guest  $\text{Bu}_4\text{N}^+\text{I}^-$  with different ratios in  $\text{CHCl}_3$ , with the total concentration fixed at  $5 \times 10^{-5}$  M.

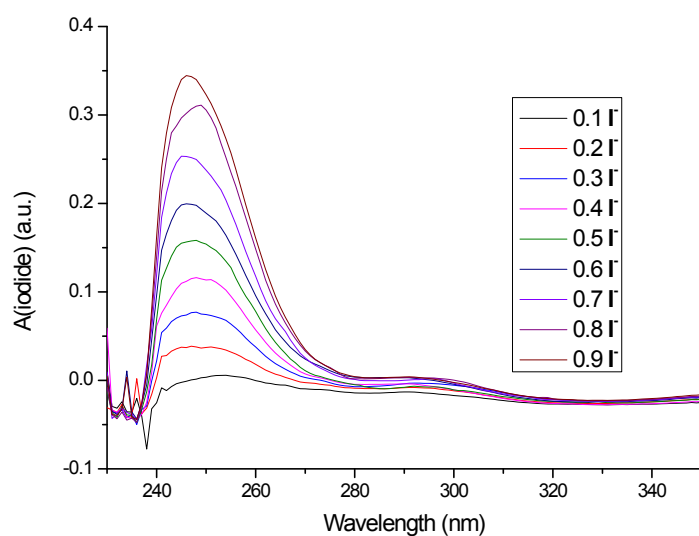

**Fig. S19.** UV-vis spectra of guest  $\text{Bu}_4\text{N}^+\text{I}^-$  with the same concentrations in the above measurements.

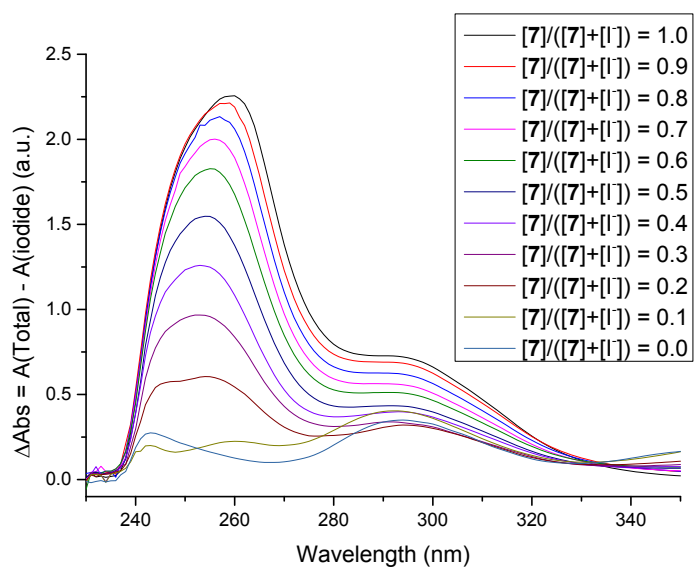

**Fig. S20.** UV-vis spectra, after deduction of  $\text{I}^-$  absorbance.

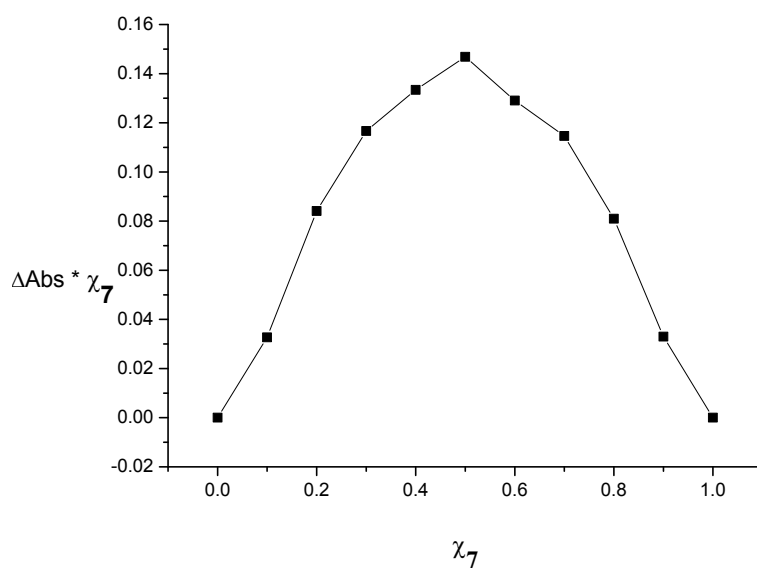

**Fig. S21.** Job-plot for the complex between host **7** and guest  $\text{Bu}_4\text{N}^+\text{I}^-$  in  $\text{CHCl}_3$  using UV-vis absorption value at  $\lambda = 290 \text{ nm}$ , showing a 1:1 stoichiometry.

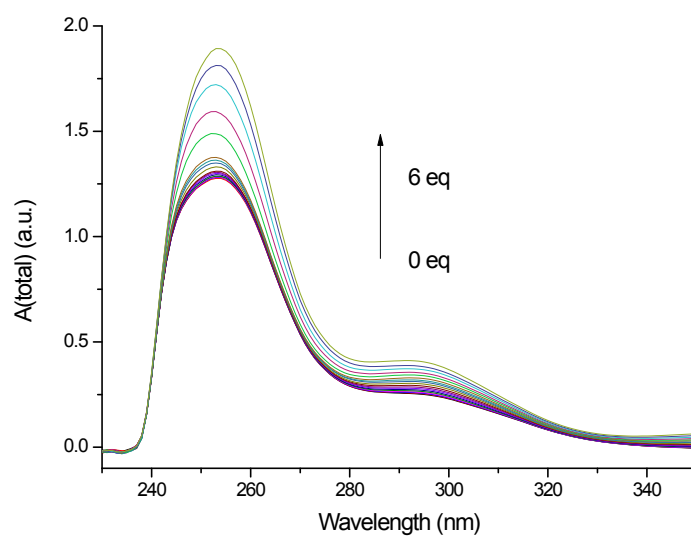

**Fig. S22.** Titration curves of host **7** (fixed at  $2 \times 10^{-5} \text{ M}$  in  $\text{CHCl}_3$ ) with 0-6 equivalents of guest  $\text{Bu}_4\text{N}^+\text{I}^-$ , 298 K.

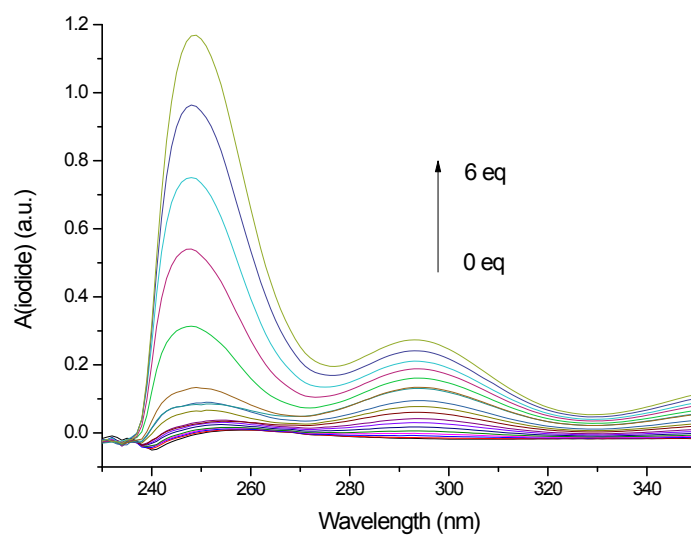

**Fig. S23.** UV-vis spectra of guest  $\text{Bu}_4\text{N}^+\text{I}^-$  with the same concentrations in the above titration measurements.

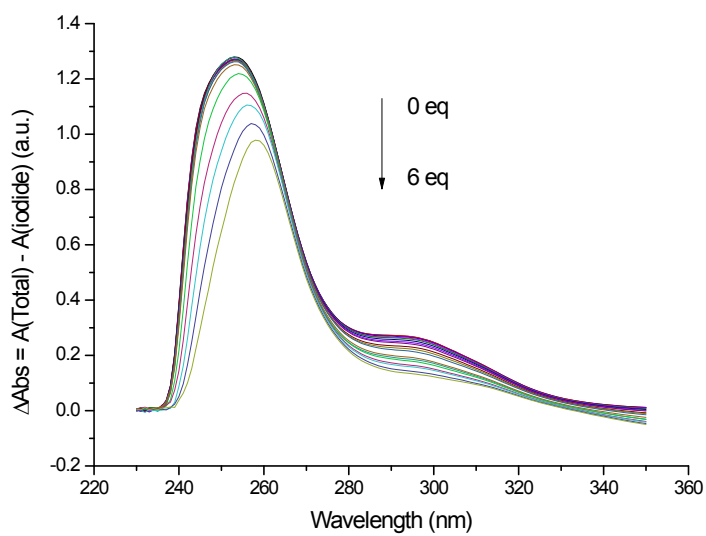

**Fig. S24.** UV-vis titration curves, after deduction of  $\text{I}^-$  absorbance.

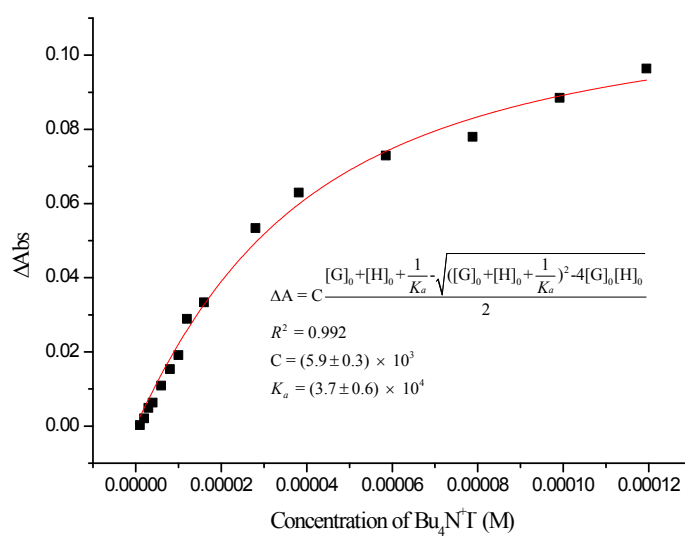

**Fig. S25.** Plot of the absorption intensity changes at  $\lambda = 282$  nm vs the guest concentration. The red line was obtained from non-linear curve-fitting using Eq. S1, yielding an association constant  $K_a = (3.7 \pm 0.6) \times 10^4 \text{ M}^{-1}$ .

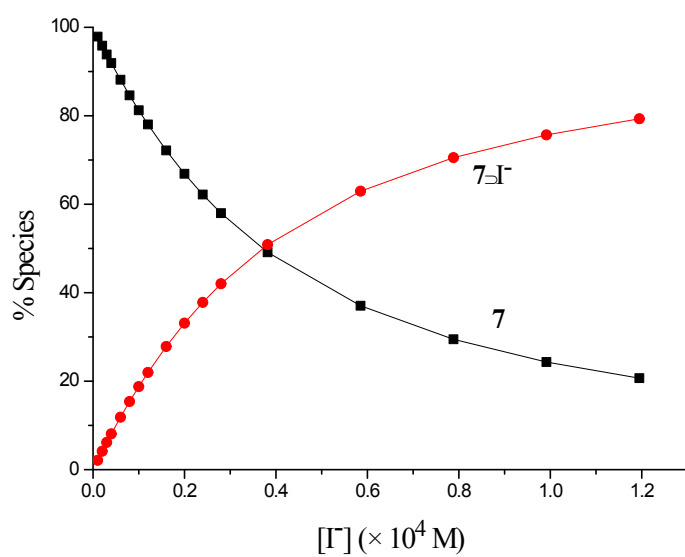

**Fig. S26.** Distribution diagram between **7** and **7⇌I<sup>-</sup>** during the spectrophotometric titration, calculated using UV-vis titration absorption data at  $\lambda = 282$  nm.

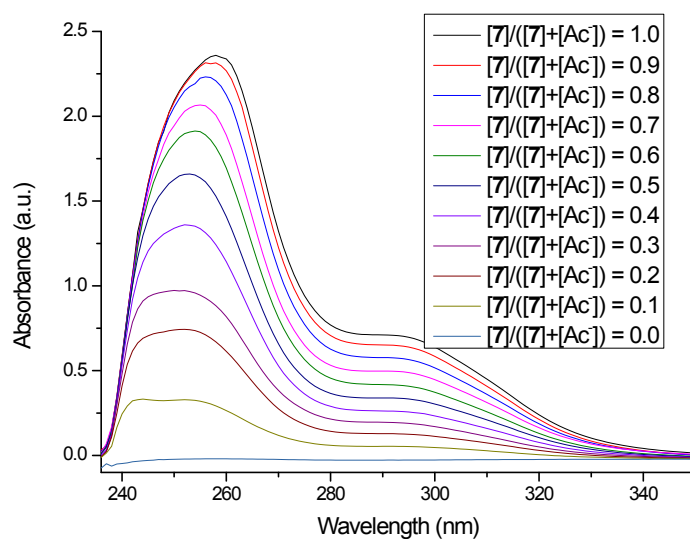

**Fig. S27.** UV-vis spectra of mixtures of host **7** and guest  $\text{Bu}_4\text{N}^+\text{Ac}^-$  with different ratios in  $\text{CHCl}_3$ , with the total concentration fixed at  $5 \times 10^{-5}$  M.

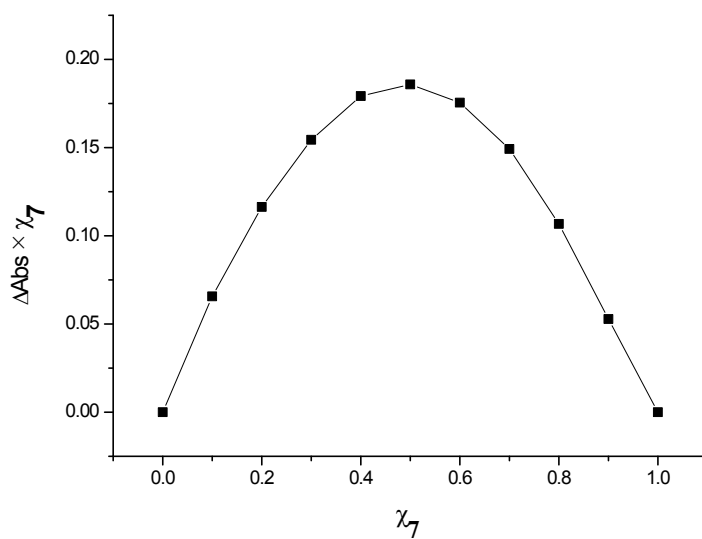

**Fig. S28.** Job-plot for the complex between host **7** and guest  $\text{Bu}_4\text{N}^+\text{Ac}^-$  in  $\text{CHCl}_3$  using UV-vis absorption value at  $\lambda = 290$  nm, showing a 1:1 stoichiometry.

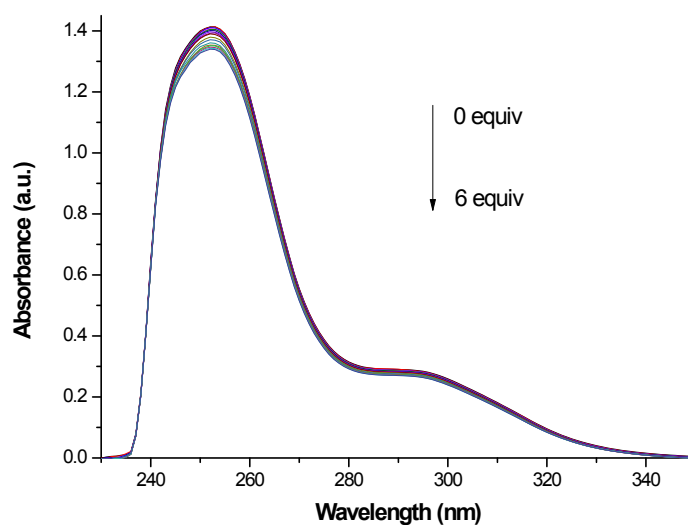

**Fig. S29.** Titration curves of host **7** (fixed at  $2 \times 10^{-5}$  M in  $\text{CHCl}_3$ ) with 0-6 equivalents of guest  $\text{Bu}_4\text{N}^+\text{Ac}^-$ , 298 K.

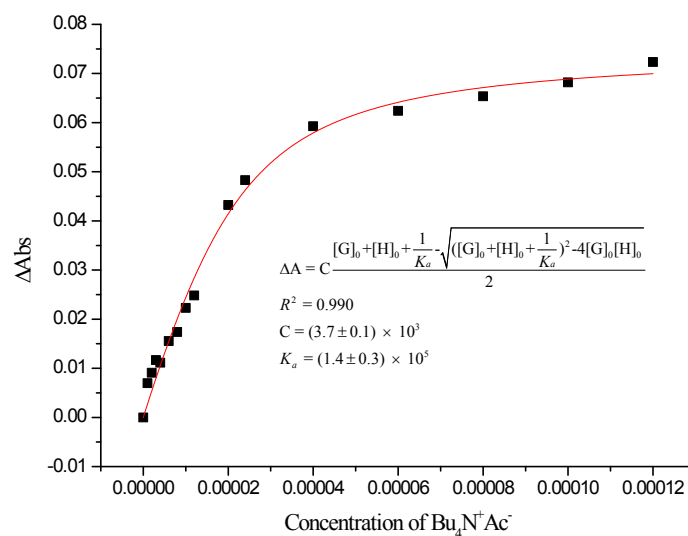

**Fig. S30.** Plot of the absorption intensity changes at  $\lambda = 255$  nm vs the guest concentration. The red line was obtained from non-linear curve-fitting using Eq. S1, yielding an association constant  $K_a = (1.4 \pm 0.3) \times 10^5 \text{ M}^{-1}$ .

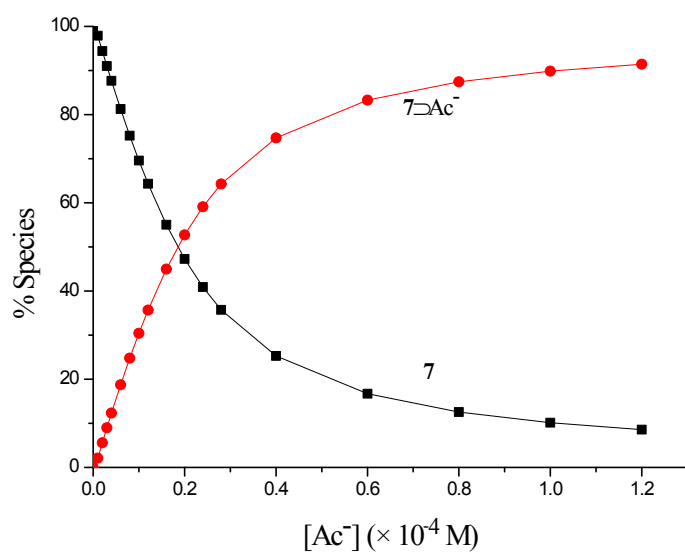

**Fig. S31.** Distribution diagram between **7** and **7⊃Ac<sup>-</sup>** during the spectrophotometric titration, calculated using UV-vis titration absorption data at  $\lambda = 255$  nm.

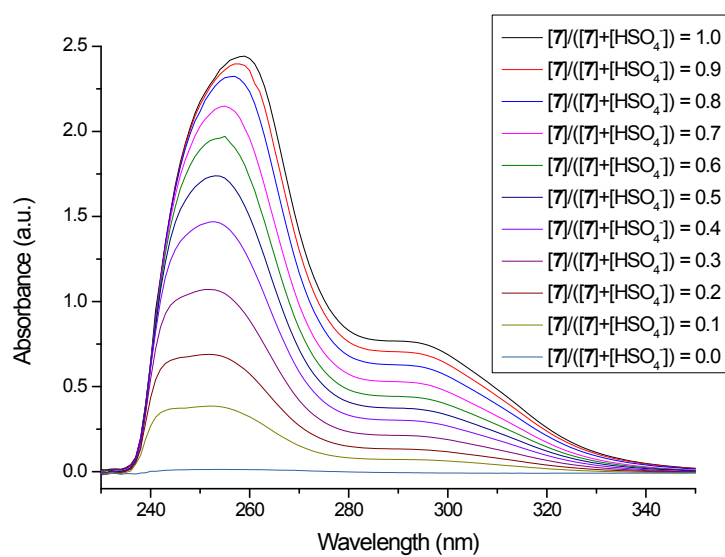

**Fig. S32.** UV-vis spectra of mixtures of host **7** and guest  $\text{Bu}_4\text{N}^+\text{HSO}_4^-$  with different ratios in  $\text{CHCl}_3$ , with the total concentration fixed at  $5 \times 10^{-5}$  M.



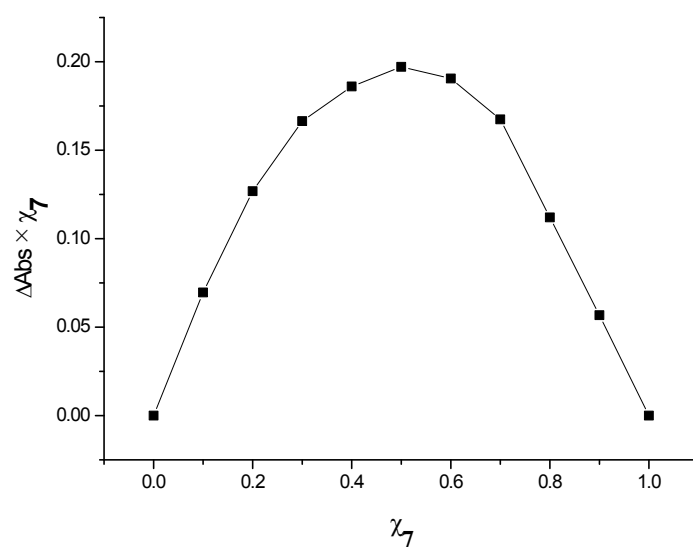

**Fig. S33.** Job-plot for the complex between host **7** and guest  $\text{Bu}_4\text{N}^+\text{HSO}_4^-$  in  $\text{CHCl}_3$  using UV-vis absorption value at  $\lambda = 290 \text{ nm}$ , showing a 1:1 stoichiometry.

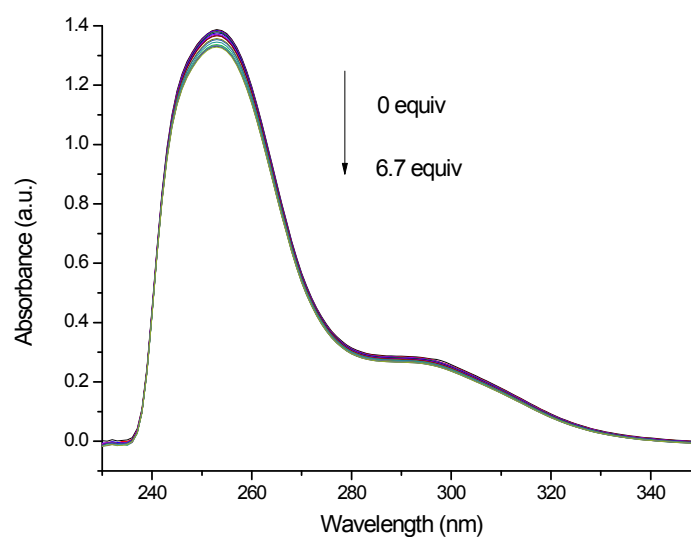

**Fig. S34.** Titration curves of host **7** (fixed at  $2 \times 10^{-5} \text{ M}$  in  $\text{CHCl}_3$ ) with 0-6.7 equivalents of guest  $\text{Bu}_4\text{N}^+\text{HSO}_4^-$ , 298 K.

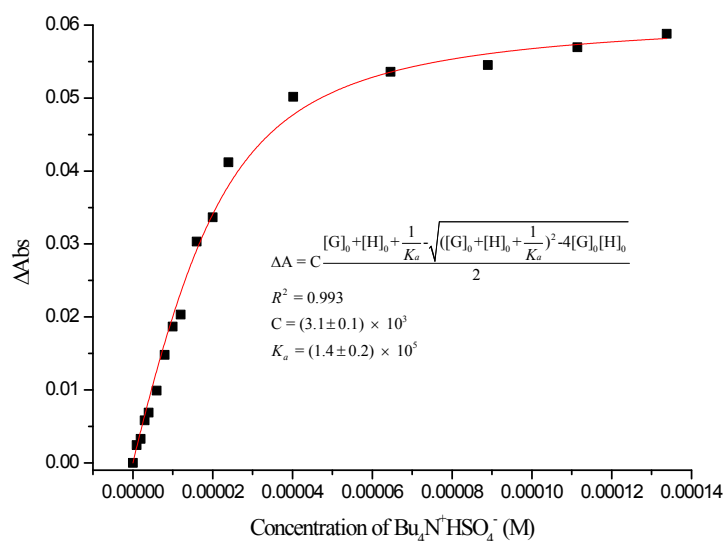

**Fig. S35.** Plot of the absorption intensity changes at  $\lambda = 254$  nm vs the guest concentration. The red line was obtained from non-linear curve-fitting using Eq. S1, yielding an association constant  $K_a = (1.4 \pm 0.2) \times 10^5 \text{ M}^{-1}$ .

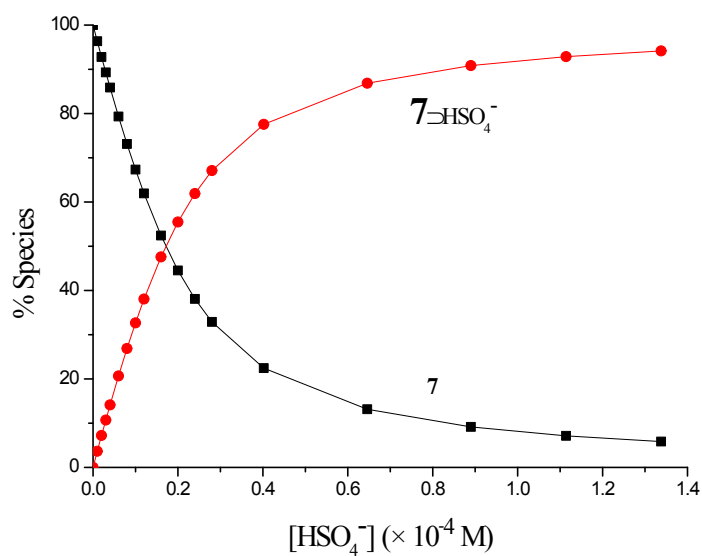

**Fig. S36.** Distribution diagram between **7** and **7-HSO<sub>4</sub><sup>-</sup>** during the spectrophotometric titration, calculated using UV-vis titration absorption data at  $\lambda = 254$  nm.

## Reference

- S1. K. A. Connors, *Binding Constants: The Measurement of Molecular Complex Stability*, Wiley, 1987
- S2. K. Hirose, in *Analytical Methods in Supramolecular Chemistry*, ed. C. Schalley, Wiley-VCH, 2012, vol. 1, pp. 27-66.
